# Supplementary material for: Marine climate change over the eastern Agulhas Bank of South Africa
Source: Copernicus journal article supplement (doi:10.5194/os-2020-44), 2020-07-08

# Coupled data assimilation:

for oceanography work over South Africa's shelf

Observations are drawn into a coupled model by data assimilation:  
ocean, land, atmosphere

- < 10% of observations are in-situ, the rest come from satellite.
- Operational products use past observations, whereas reanalysis products use near-future and late-arriving data.
- Ocean & land assimilation have a generous multi-day time window, but atmospheric assimilation has a narrow cut-off (few hours).
- Observations have 'influence' according to the type, accuracy & reliability, eg. in-situ above remote, calibrated above unknown.
- At a model grid-point, the observations affect the interpolated value according to proximity.
- Incoming data are constrained to model physics, climatology, persistence & prior forecast.

Data assimilation is the technique whereby observational data are combined with output from a numerical model to produce an **optimal** estimate of the **evolving** state of the system.

## Why We Need Data Assimilation

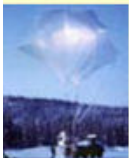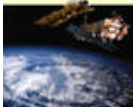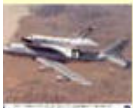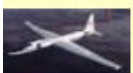

- range of observations
- range of techniques
- different errors
- data gaps
- quantities not measured
- quantities linked

## Types of Data Assimilation

- Intermittent
- Continuous

## The Data Assimilation Process

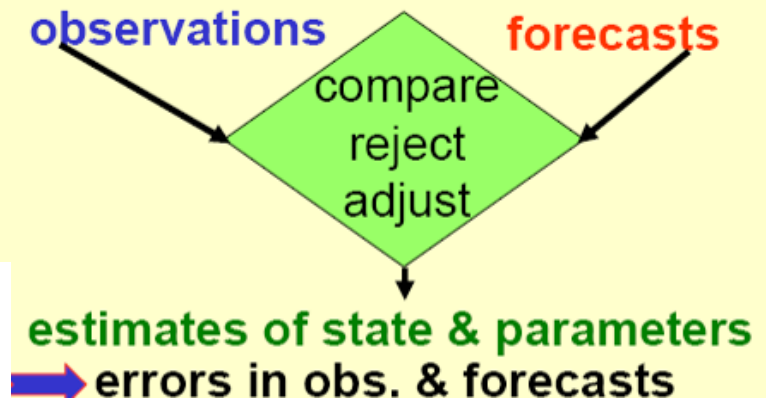

## Methods of Data Assimilation

- Optimal interpolation (or approx. to it)
- 3D variational method (3DVar)
- 4D variational method (4DVar)
- Kalman filter (with approximations)

# Key data streams

---

- Surface in-situ measurements: ship, buoy
- Sub-surface observations: float, XBT
- Satellite remote sensing:
  - De-clouded visible & infrared
  - Passive microwave (wide swath)
  - Active microwave (narrow swath)

Model forecast, climatology, persistence

- Forcing from atmosphere and land models
- Theoretical calculations by ocean model

Near-surface temp obs density

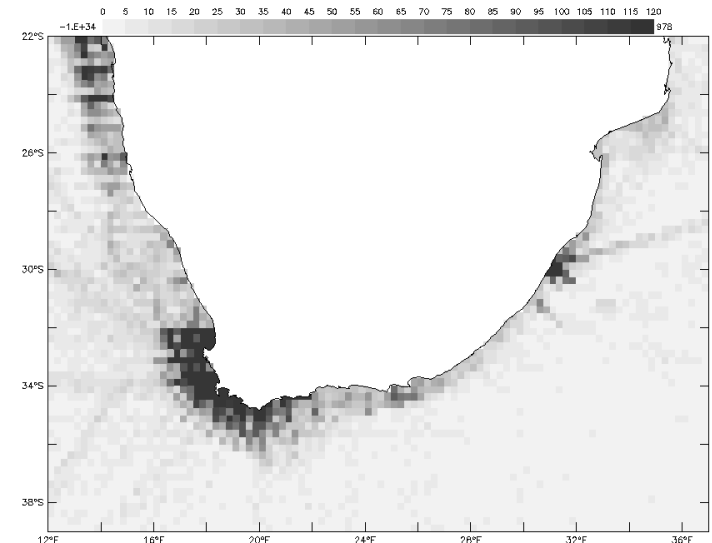

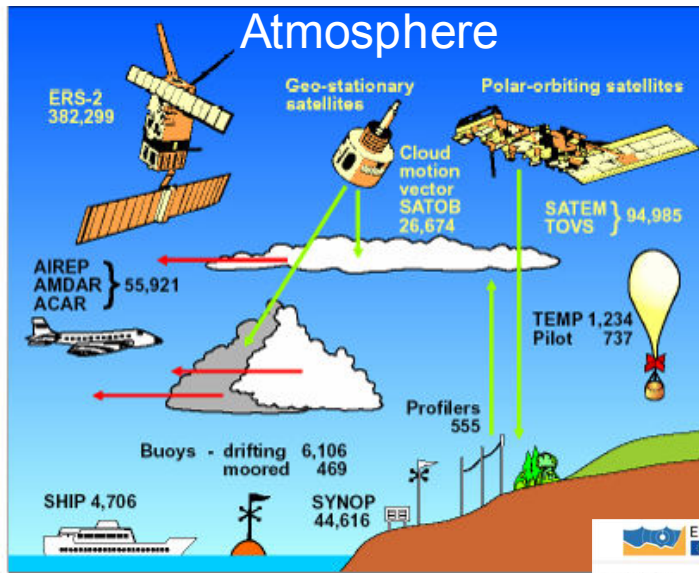

Argo/Profiler : 3830  
 Gliders : 3  
 Drift : 1661  
 Mooring : 998  
 Ferrybox : 79  
 Radar : 150  
 Bathy messages on GTS : 13  
 CTD profiles : 352  
 Mini logger : 4  
 River flows : 173  
 Profiling mooring : 1  
 Marine mammal : 90  
 TESAC : 0  
 XBT or XCTD profiles : 0  
 Tide Gauge : 781

Globally  
 Locally

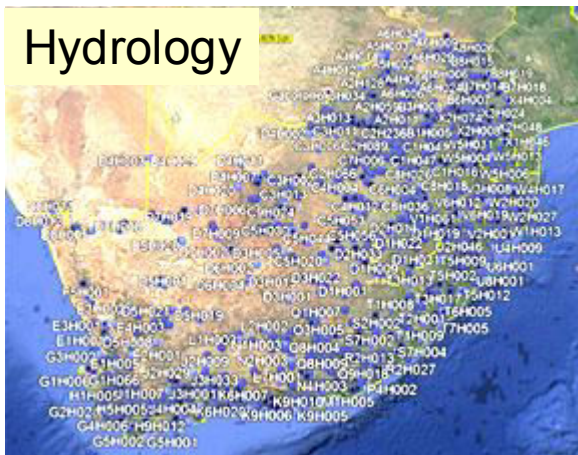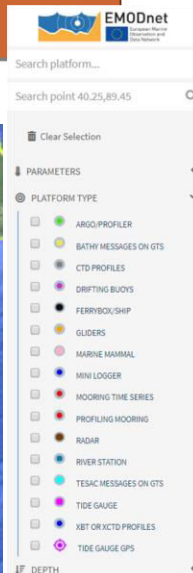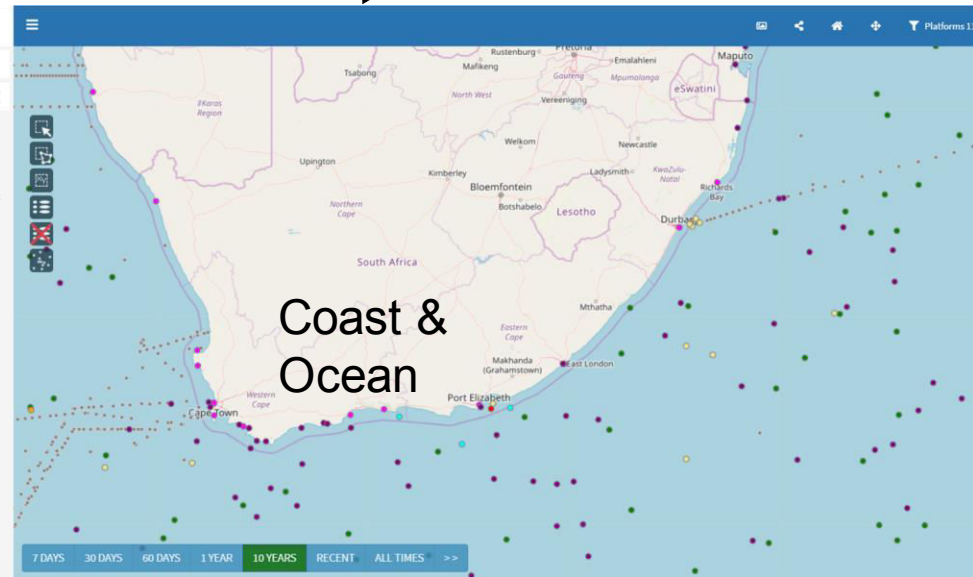

<https://www.godae-oceanview.org/science/ocean-forecasting-systems/assimilation-characteristics/>  
<http://www.marineinsitu.eu/dashboard/>  
<http://www.emodnet-physics.eu/Map/>  
<https://www.ecmwf.int/en/forecasts/quality-our-forecasts/monitoring-observing-system#Ocean>



# Coupled Data Assimilation

## Atmosphere Observations

Fast  
variations

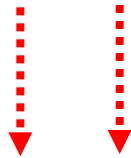

Land  
Obs

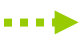

Coupled Model Assimilation

Realistic condition of  
the Earth System

Slow  
variations

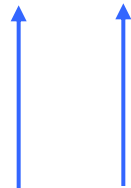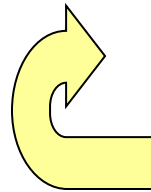

Adapting assimilation to inputs

## Ocean Observations

Multi-day coverage by active MW radiometers that provide wind fields for evaporation and Ekman transport

Remember that land-based wind data are not assimilated due to 'exposure'.

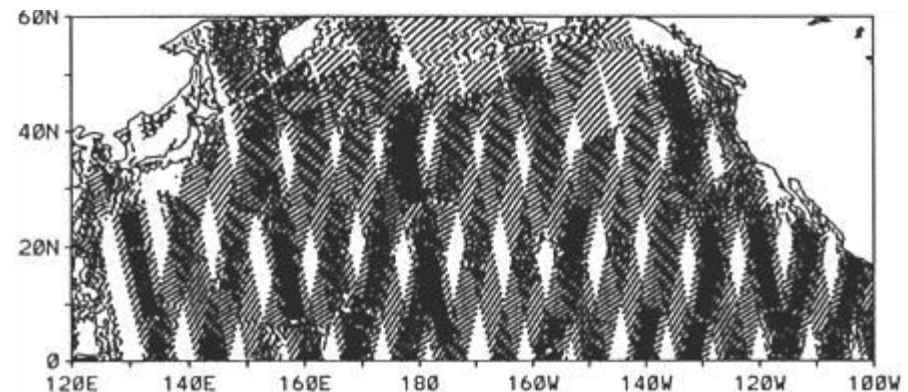

# Coupled data assimilation

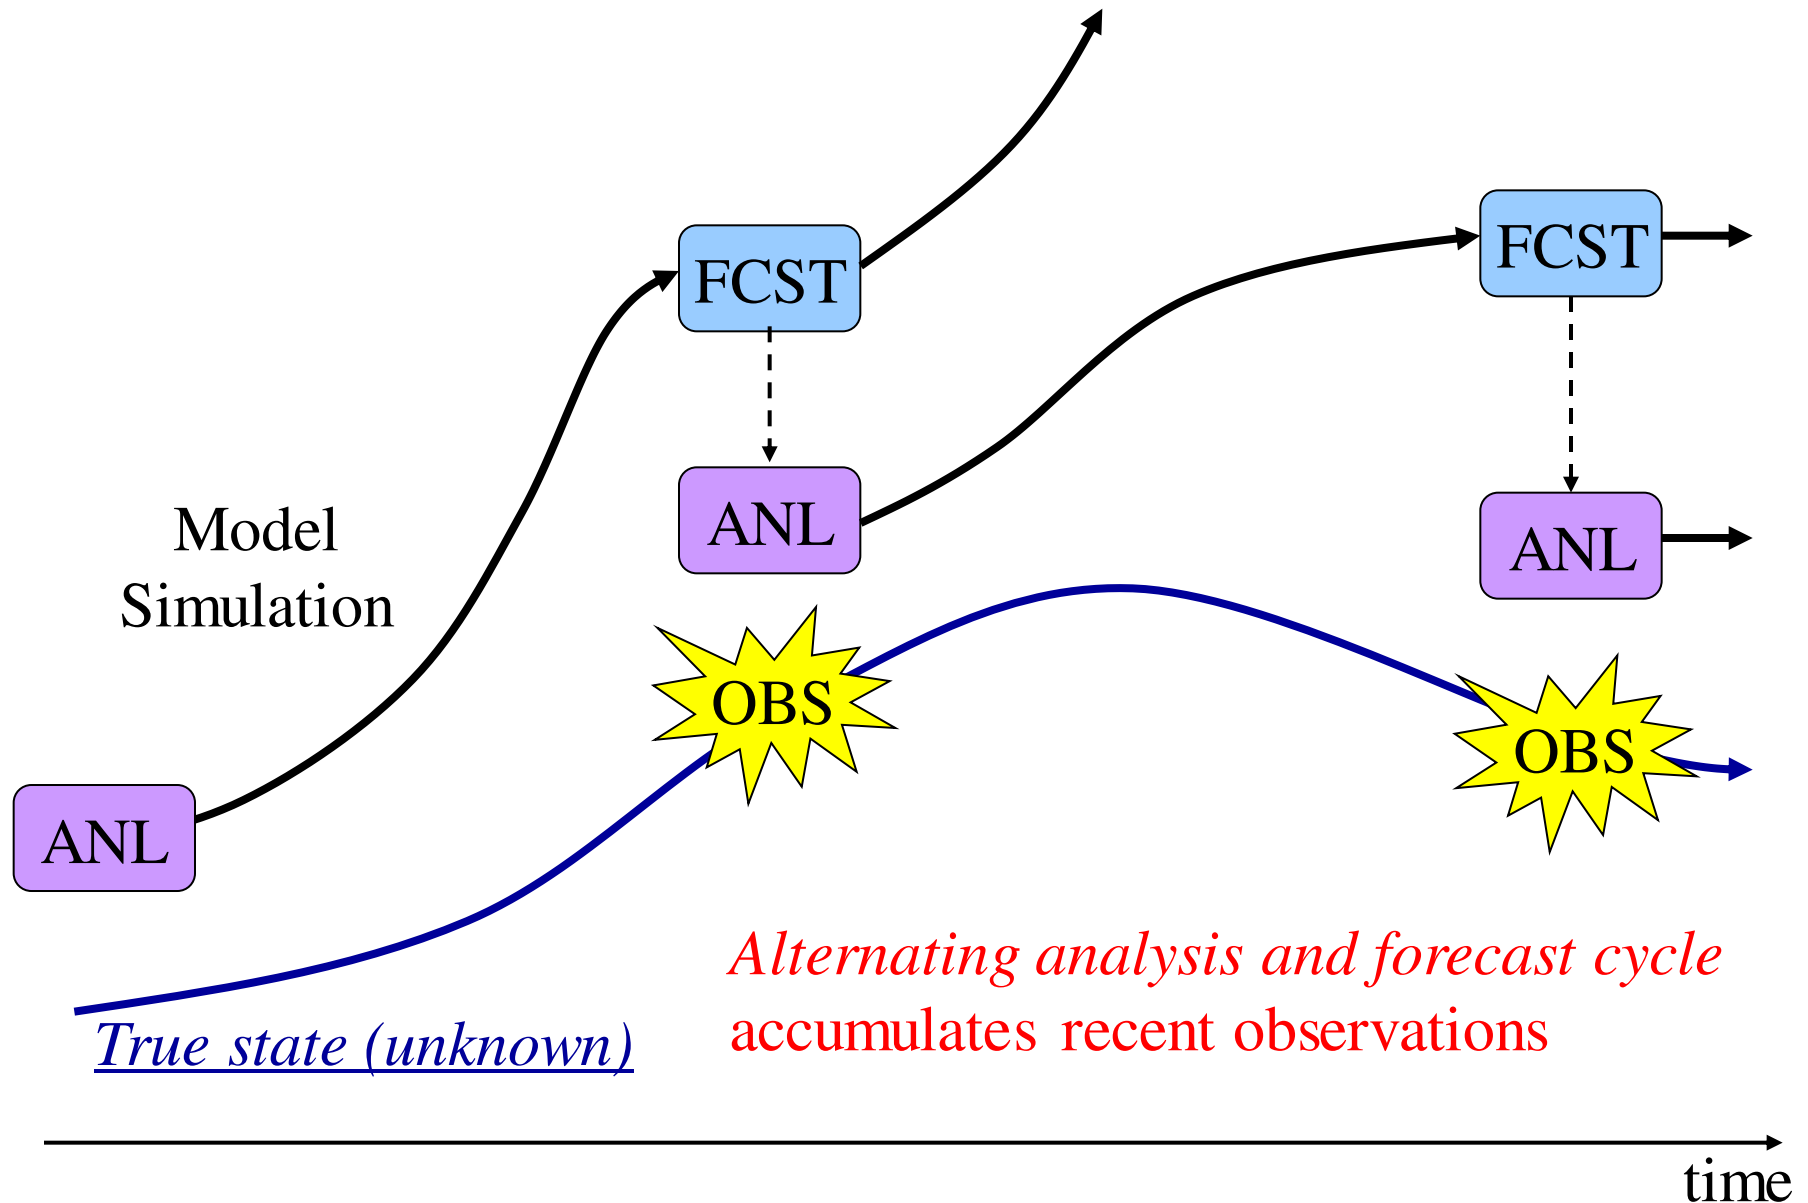

# Ocean model data interpolation

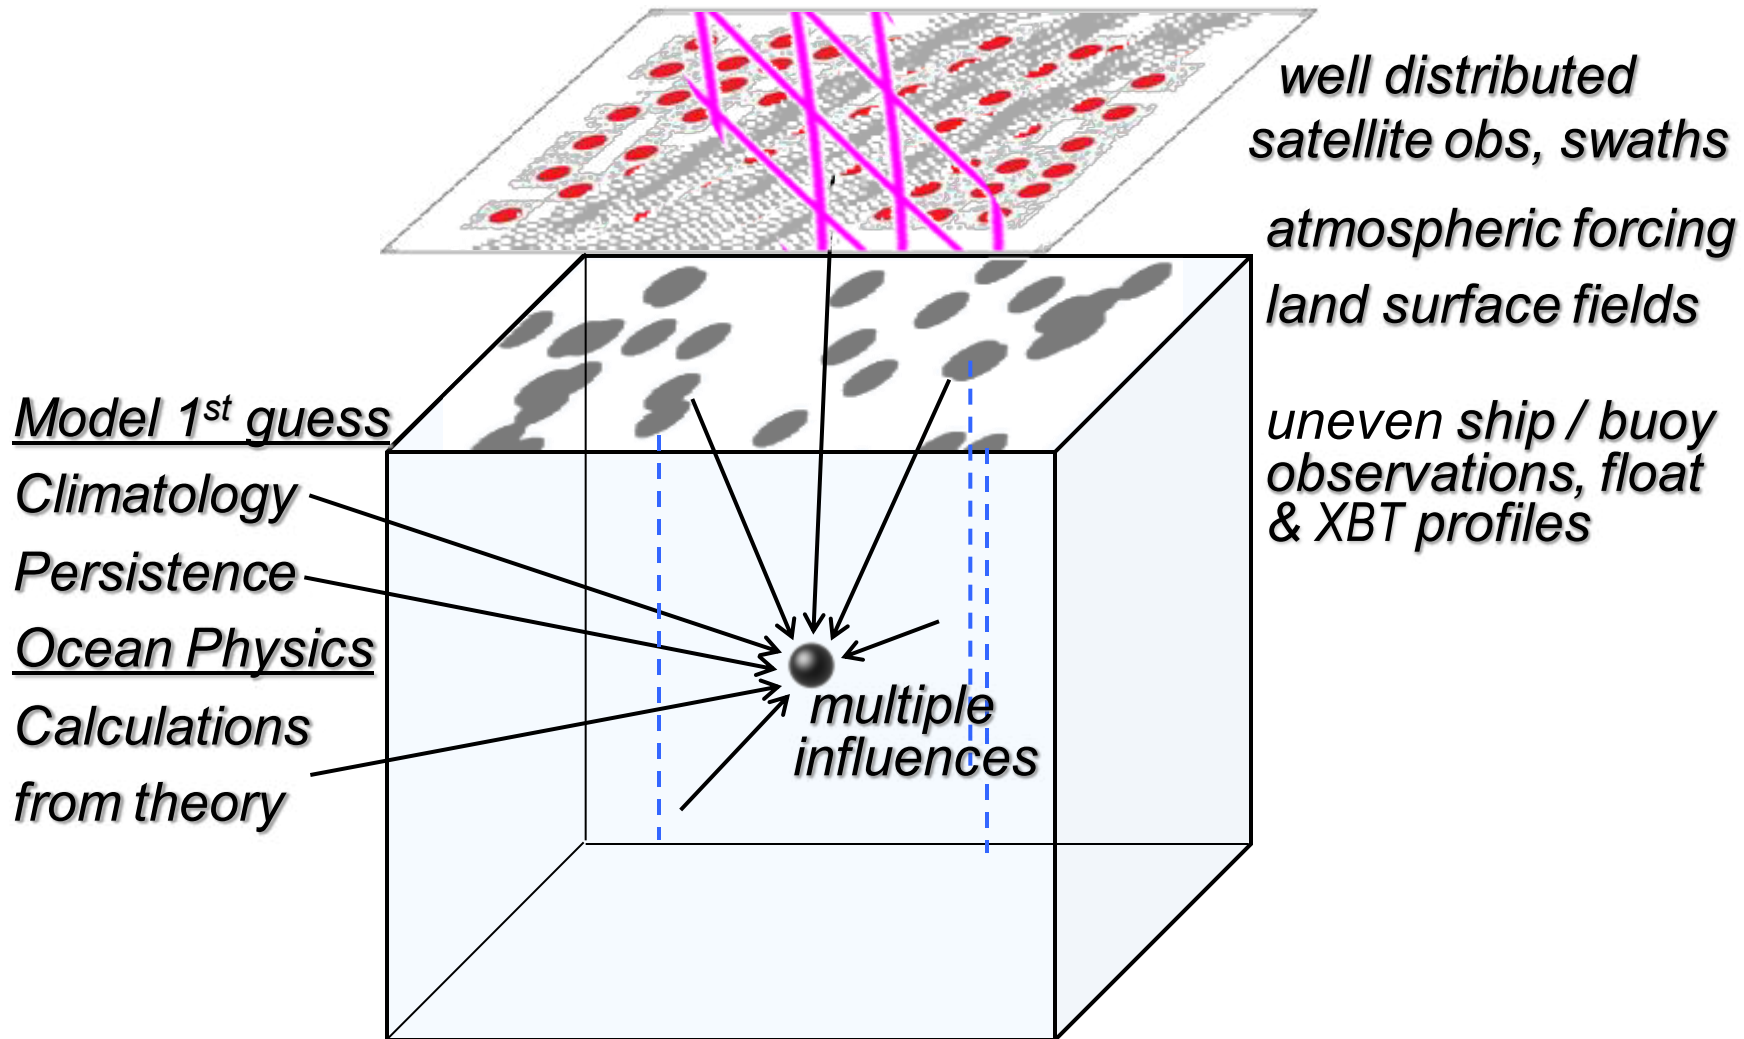

*Measurements at earlier (or later) times have less influence than recent*

# Ocean observing system

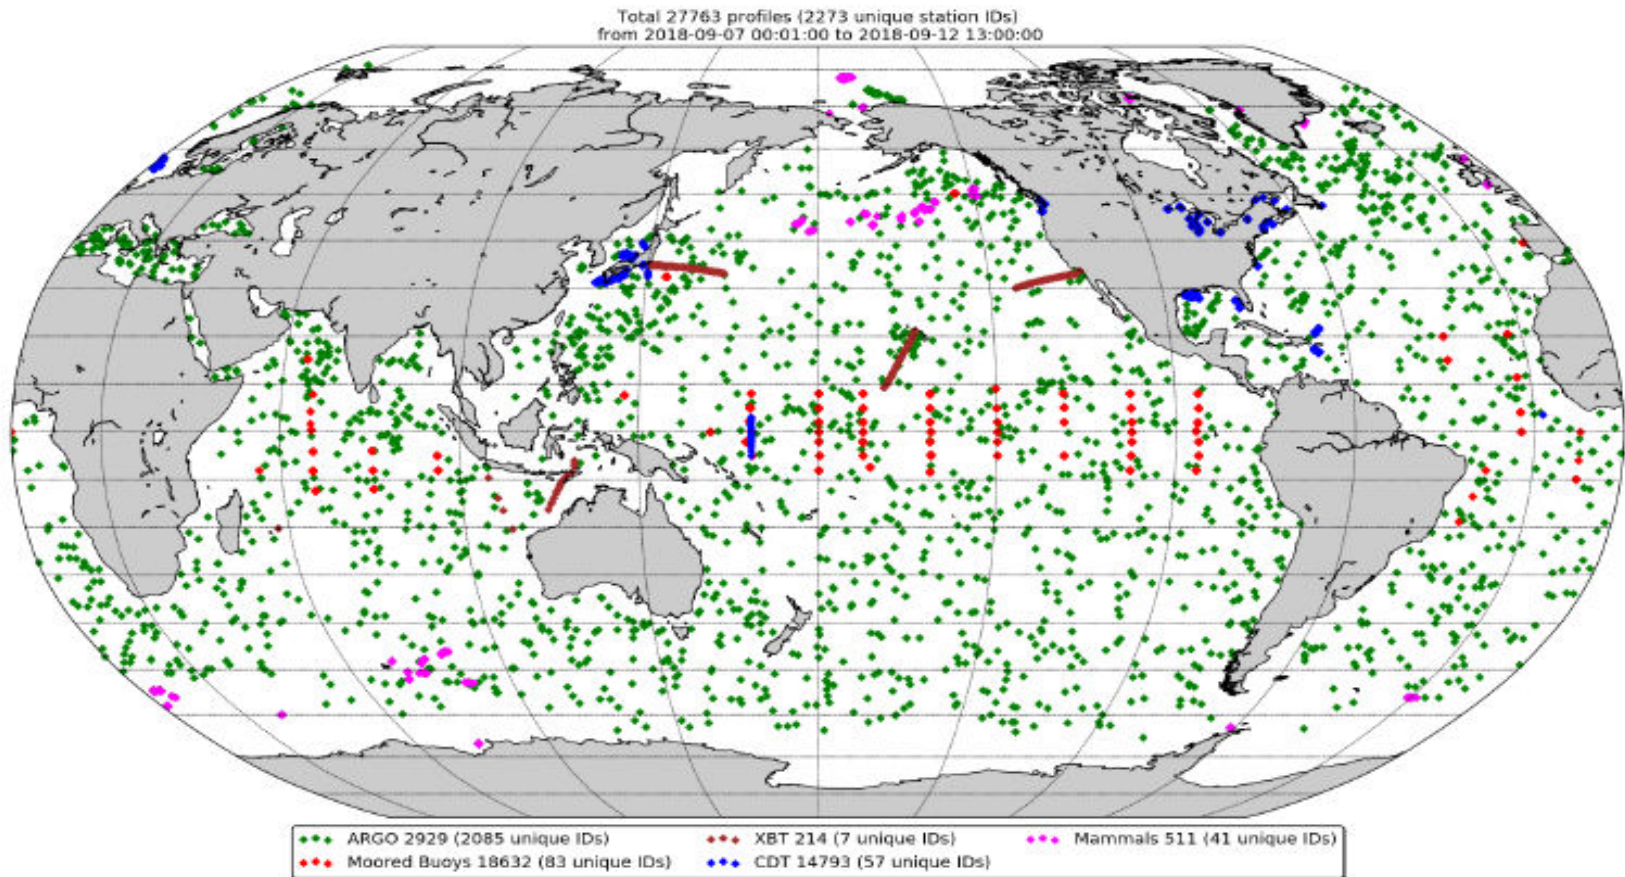

Floats, buoys, ships, and other in-situ obs



# Satellite altimeter obs of geoid-corrected sea surface height anomaly

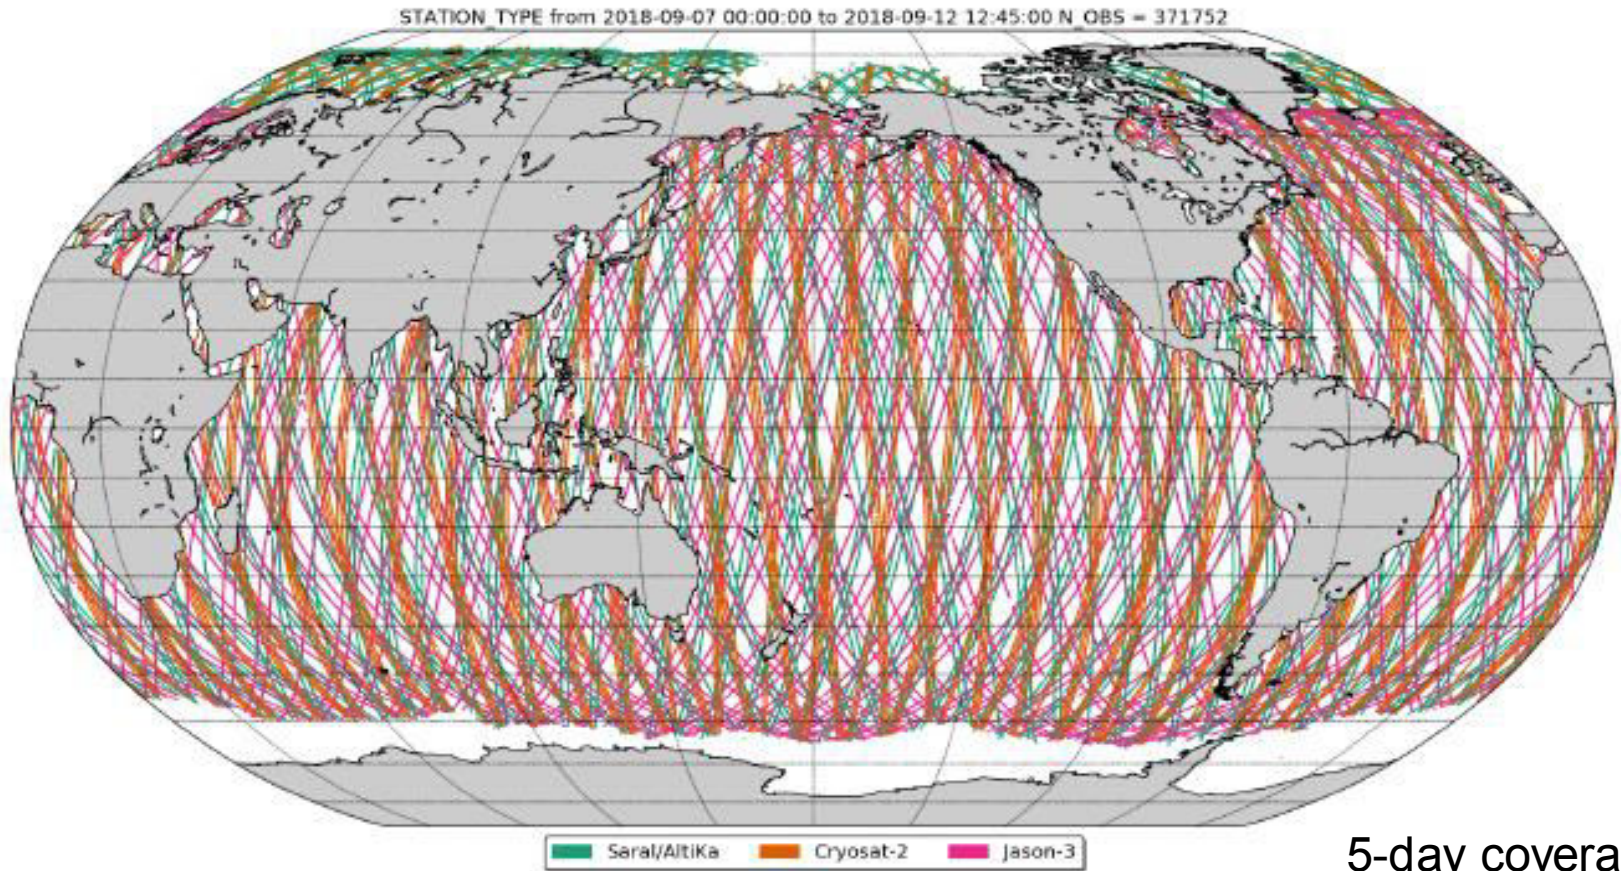

# SA involvement in real-time ocean monitoring is limited

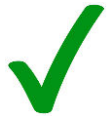

- Weather reports from station / ship
- Global profiling by floats and aircraft

but

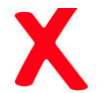

- No marine stations (buoys) reporting
- Harbours tide gauges are 'quiet'

## Global Ocean- In-Situ Near-Real-Time Observations

Product id: INSITU\_GLO\_NRT\_OBSERVATIONS\_013\_030

Dataset: Oceanotron-INS-COROLIS-GLO-NRT-OBS\_PROFILE\_LATEST

Variable: Oceanotron-INS-COROLIS-GLO-NRT-OBS\_PROFILE\_LATEST

Units: Time: 2019-05-02 00:00:00.000Z +/- 1 week Depth (m):

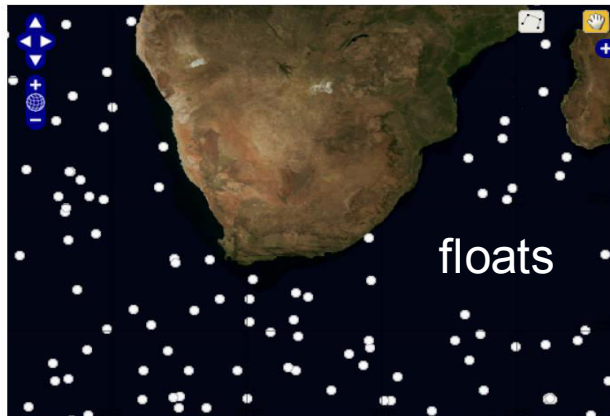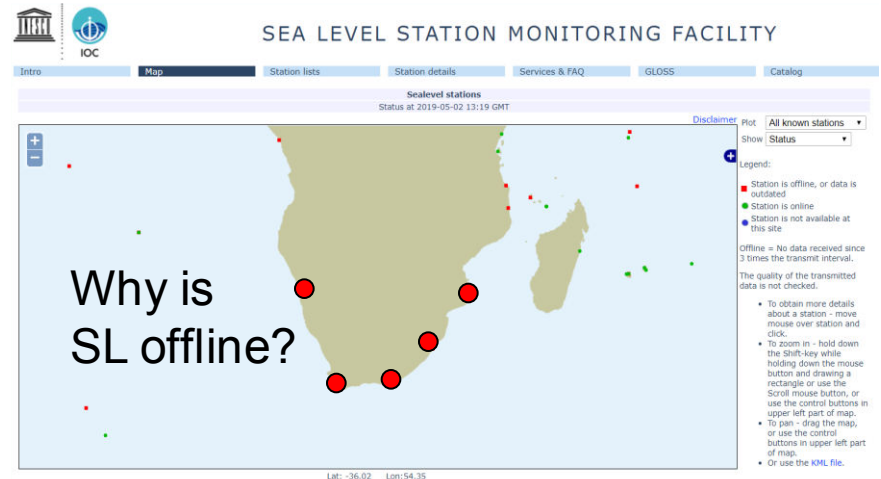

## SAWS: best reporting in Africa

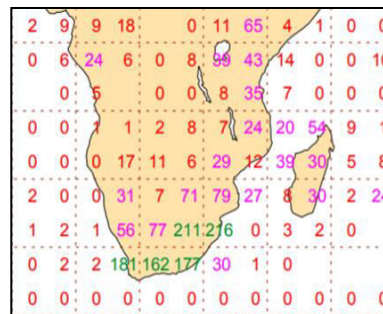

surface

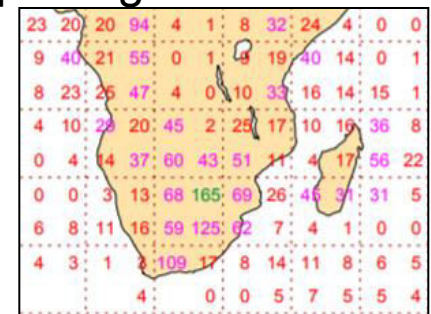

aircraft

The SA marine science community is skeptical of ocean reanalysis; users do not feel confident in their outcomes, so operational research has limited influence.



# SST from IR+MW satellite with insitu-calibration, after de-clouding over multi-day window

Latest L4 sea-surface temperature observations from OSTIA (20180912)

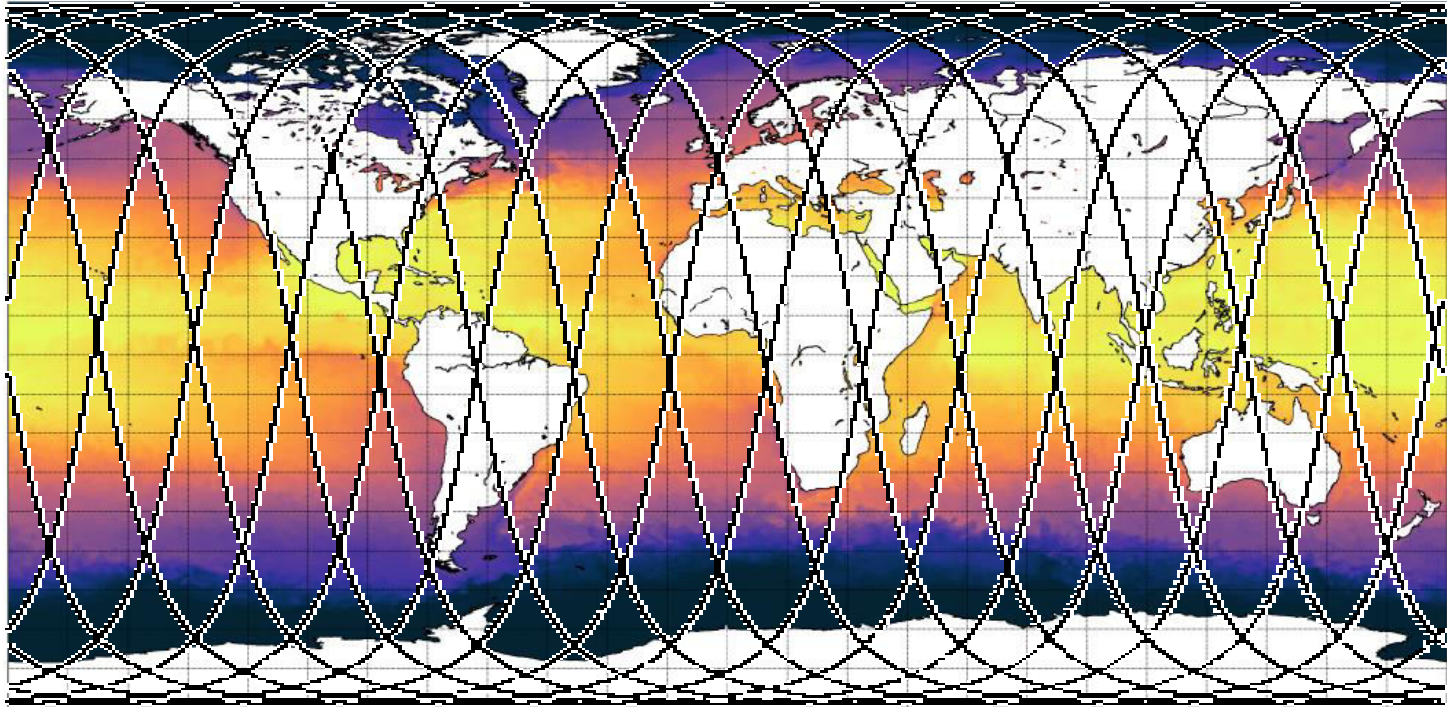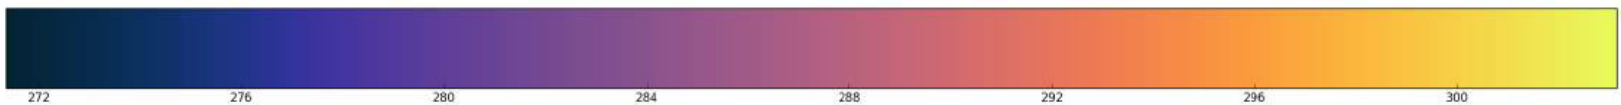

# Overlapping satellite missions to collect essential data

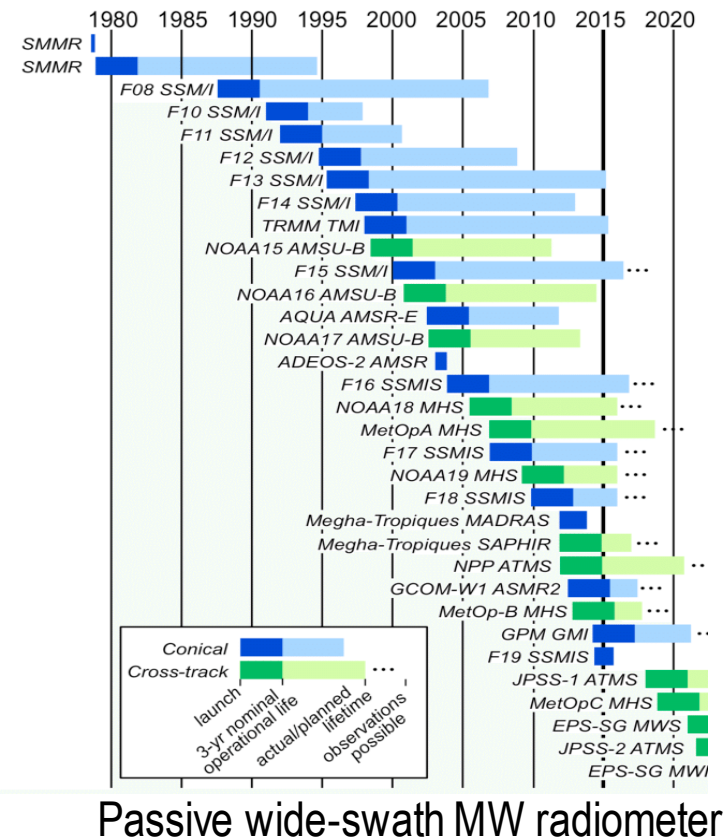

'footprint' size: 50 km → 25 km → 10 km

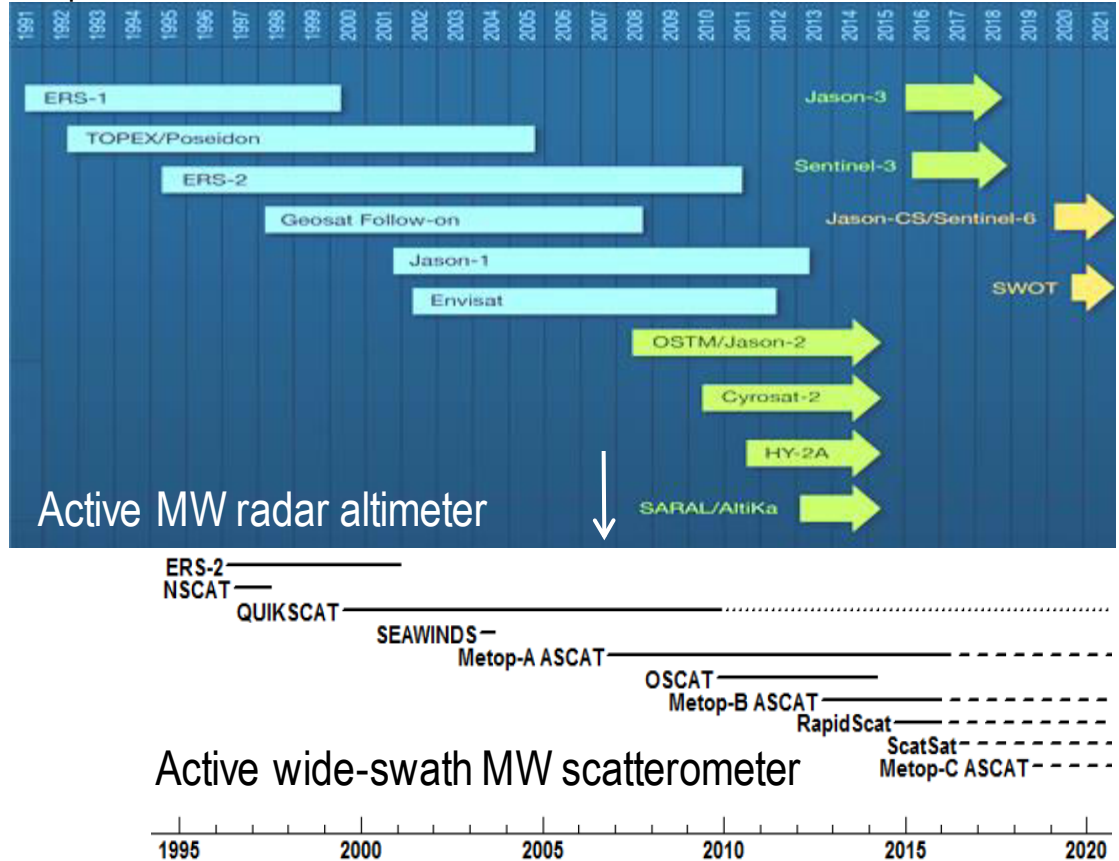

Ocean reanalysis products have improving technology, and resolve the coastal gradient after 2008, with the advent of higher resolution radiometers

# Satellite vs reanalysis

- Individual satellites have orbital limitations and aging radiometers.
- Satellite 'level-3' products are corrected for radiometer drift, atmospheric contamination (reflection, scattering, absorption), coastal contamination by land fraction within radiometer footprint.
- Level-3 products are interpolated to a grid after correction, and usually represent composites of multiple images within a sliding time window.
- SST reanalysis products blend IR and MW products, to reduce contamination: eg. GHR-MUR Level-4 since 2002.
- Ocean reanalysis uses multiple level-3 satellite products from NASA, ESA, etc, in addition to in-situ & ancillary data, model physics & recent measurements.
- Why use single satellite products?

| Instrument  | Radiometer/Orbit | Resolution | Error   | Issues           |
|-------------|------------------|------------|---------|------------------|
| AVHRR       | IR/Polar         | 1 km       | 0.6°C   | Clouds, aerosols |
| AATSR       | IR/Polar         | 1 km       | 0.3°C   | Clouds, sparse   |
| MODIS       | IR/Polar         | 1 km       | 0.5°C   | Clouds, aerosols |
| VIIRS       | IR/Polar         | 1 km       | 0.4°C   | Clouds, aerosols |
| GOES Imager | IR/Geostationary | 6 km       | 1.0°C   | Clouds, aerosols |
| SEVIRI      | IR/Geostationary | 6 km       | 0.7°C   | Clouds, aerosols |
| MT-SAT      | IR/Geostationary | 6 km       | 0.7°C   | Clouds, aerosols |
| AVHRR       | IR/Polar         | 9 km       | 0.4°C   | Clouds, aerosols |
| AMSR-E      | MW/Polar         | 25 km      | 0.5°C   | Land, rain       |
| AMSR2       | MW/Polar         | 25 km      | 0.5°C   | Land, rain       |
| WindSat     | MW/Polar         | 25 km      | 0.5°C   | Land, rain       |
| TMI         | MW/Equatorial    | 25 km      | 0.5°C   | Land, rain       |
| Buoys/ships | <i>in situ</i>   | variable   | ~ 0.5°C | Depth, sparse    |

# DA methodology:

ECMWF ORA5

- ▶ Methodology is 3D-Var-FGAT
- ▶ Assimilation of in situ profiles, SLA, SIC
- ▶ Relaxation of SST towards OSTIA
- ▶ OCEAN5 is a reanalysis-analysis system with 2 streams - behind real-time and real-time
- ▶ Assimilation window varies from 8 days to 12 days and split into two chunks
- ▶ Minimisations performed separately for sea ice and ocean components
- ▶ Atmospheric forcing comes from the HRES system

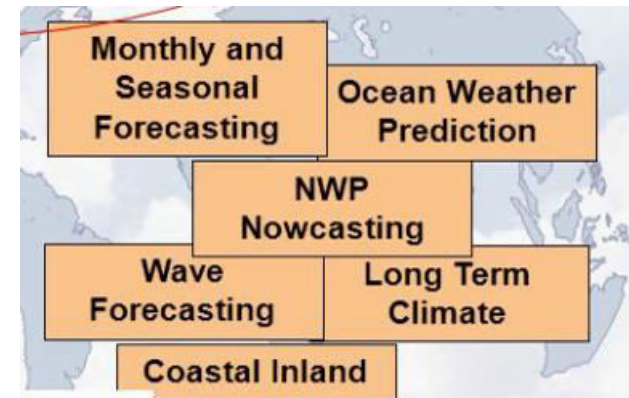

# A sliding window for incoming data

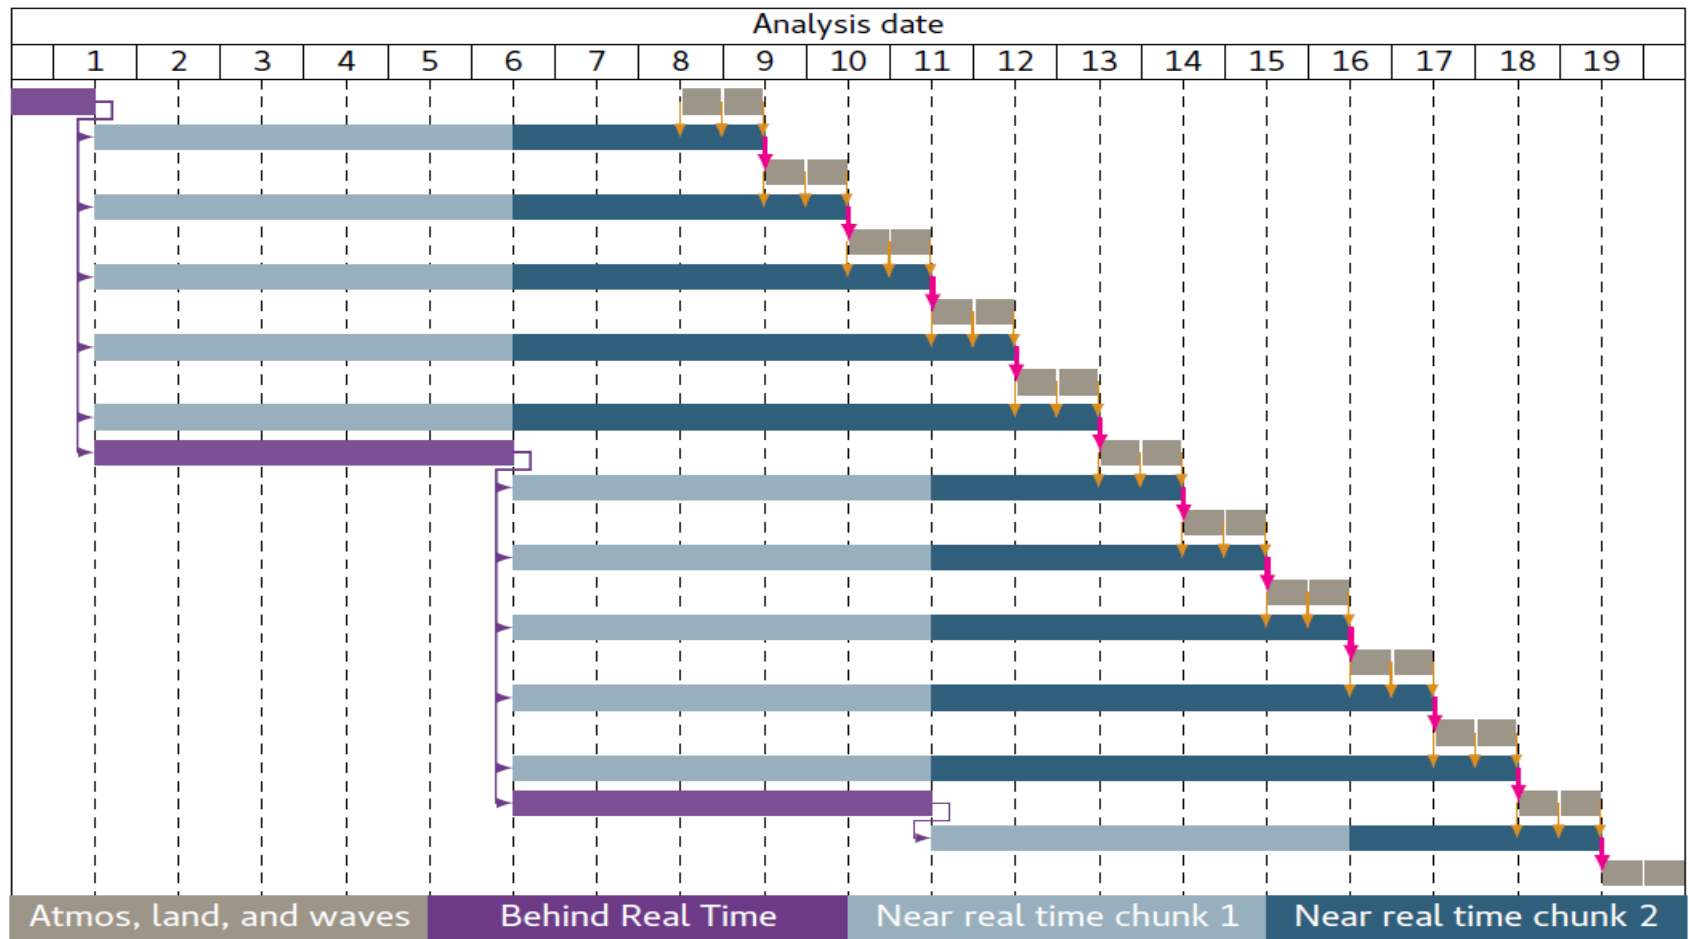

# Incremental Update Cycle

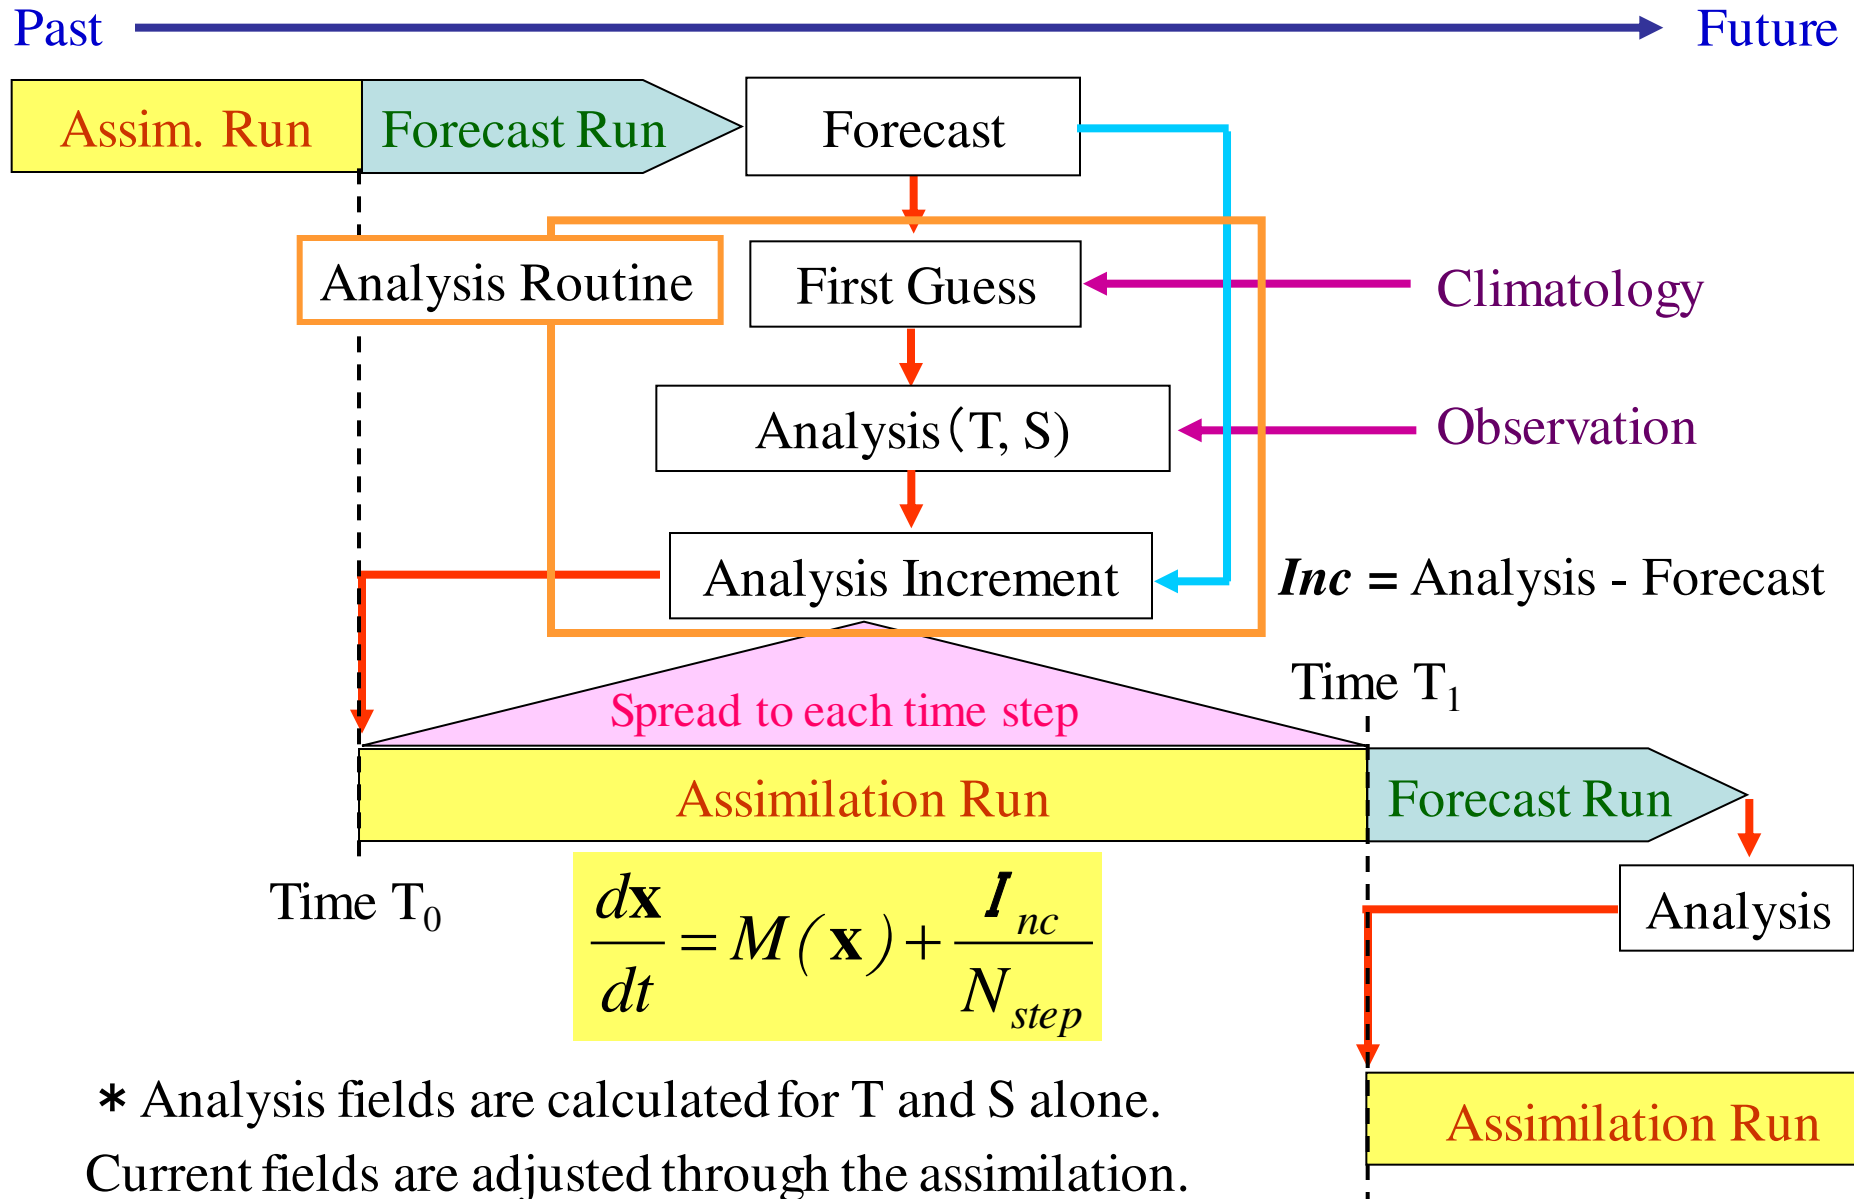



Cold start, has no prior 'knowledge'

sequential, intermittent assimilation:

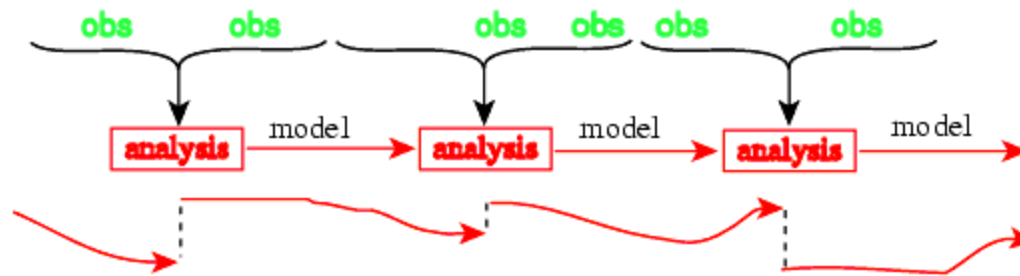

Warm start, uses persistence to 'nudge' the result

sequential, continuous assimilation:

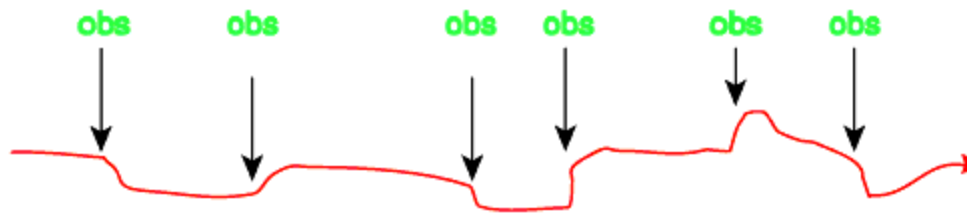

Block run, uses climatology to 'nudge' the result

non-sequential, intermittent assimilation:

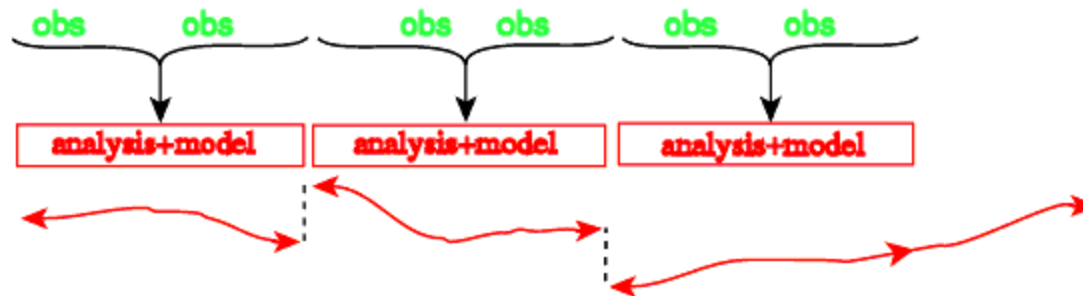

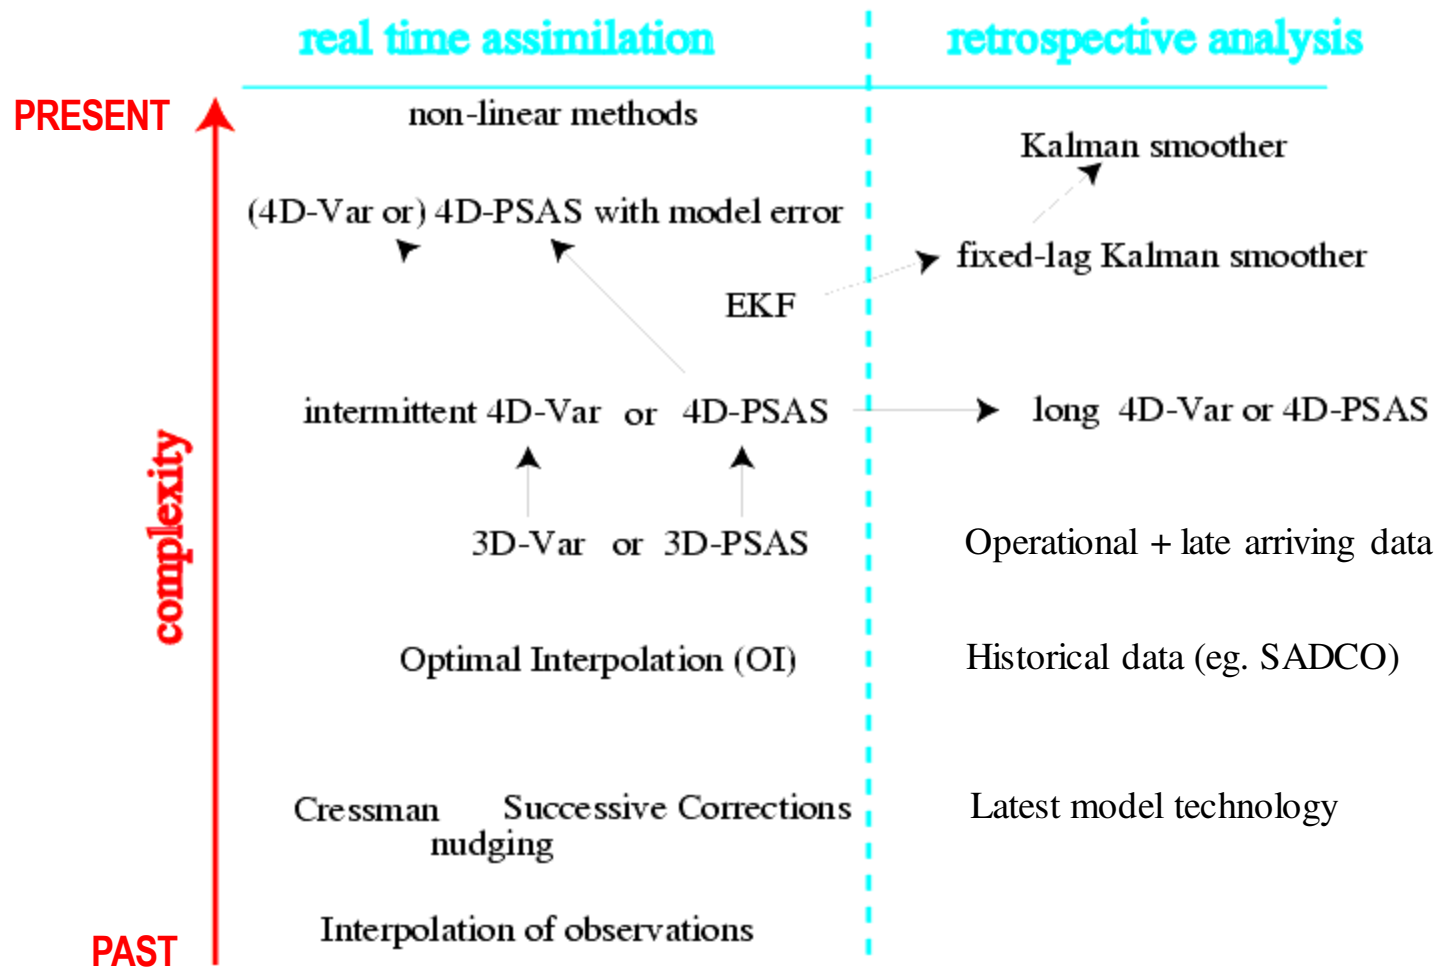

# Different time-scales for ocean/land and atmospheric (NWP) modelling

- NWP forecasts have to be produced in a timely fashion
- Not all ocean observations are available for current atmospheric cut-off times
  - ▶ Would like coupled assimilation for:
    - Coupled observation operators
    - Atmospheric bias correction of ocean sensitive satellite observations
    - More balanced initial conditions
- ▶ Outer loop coupling with the atmosphere – lots of potential to help with bias correction and screening of ocean sensitive satellite observations
  - ▶ Aligning the ocean analysis window to the current atmospheric window would mean missing lots of vital in situ observations
  - ▶ Care needs to be taken not to inherit ocean model biases into the atmospheric analysis

# Atmospheric Model

- Aerosol processes (Microphysics)
  - Nucleation/condensation
  - Phase changes
- Cloud processes
  - Condens./evap./deposition/sublim.
  - Precipitation
  - Stability (Vertical/Slantwise Ascent)
  - Convection
  - Entrainment
- Radiative transfer
  - UV/visible/near-IR/thermal-IR
  - Scattering/absorption
  - Snow, ice, water albedos
- Meteorological processes
  - Velocity
  - Geopotential
  - Pressure
  - Water vapor
  - Temperature
  - Density
  - Turbulence
- Surface processes
  - Temperatures and water content of
    - Soil      Water      Snow
    - Sea ice    Vegetation    Roads
    - Roofs
  - Surface energy/moisture fluxes
  - Ocean-atmosphere exchange
  - Ocean dynamics, chemistry

# Five steps in the generation of a numerical model product

## **Observations**

- All models require obs from an area larger than their forecast domain
- Forecasts longer than 2-3 days require global data sets
- Global Telecommunications System (GTS) gathers and disseminates conventional data to nearly all countries

## **Analysis**

- Objective analysis – obs checked for errors and interpolated to grid on which model atmosphere is represented

## **Initialization**

- Adjusts the analyzed data so that the model and data are dynamically consistent
- Ensures no “noise” is generated when forecast begins

## **Forecast**

- System of forecast eqns marched forward in time until desired forecast length is reached

## **Output**

- Forecast maps produced and sent to users, including computations of many quantities not directly forecast by the model
- Forecasts verified to document model errors and biases in order to formulate improvements in the future.

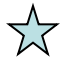

# Feedback between SST and rain rate

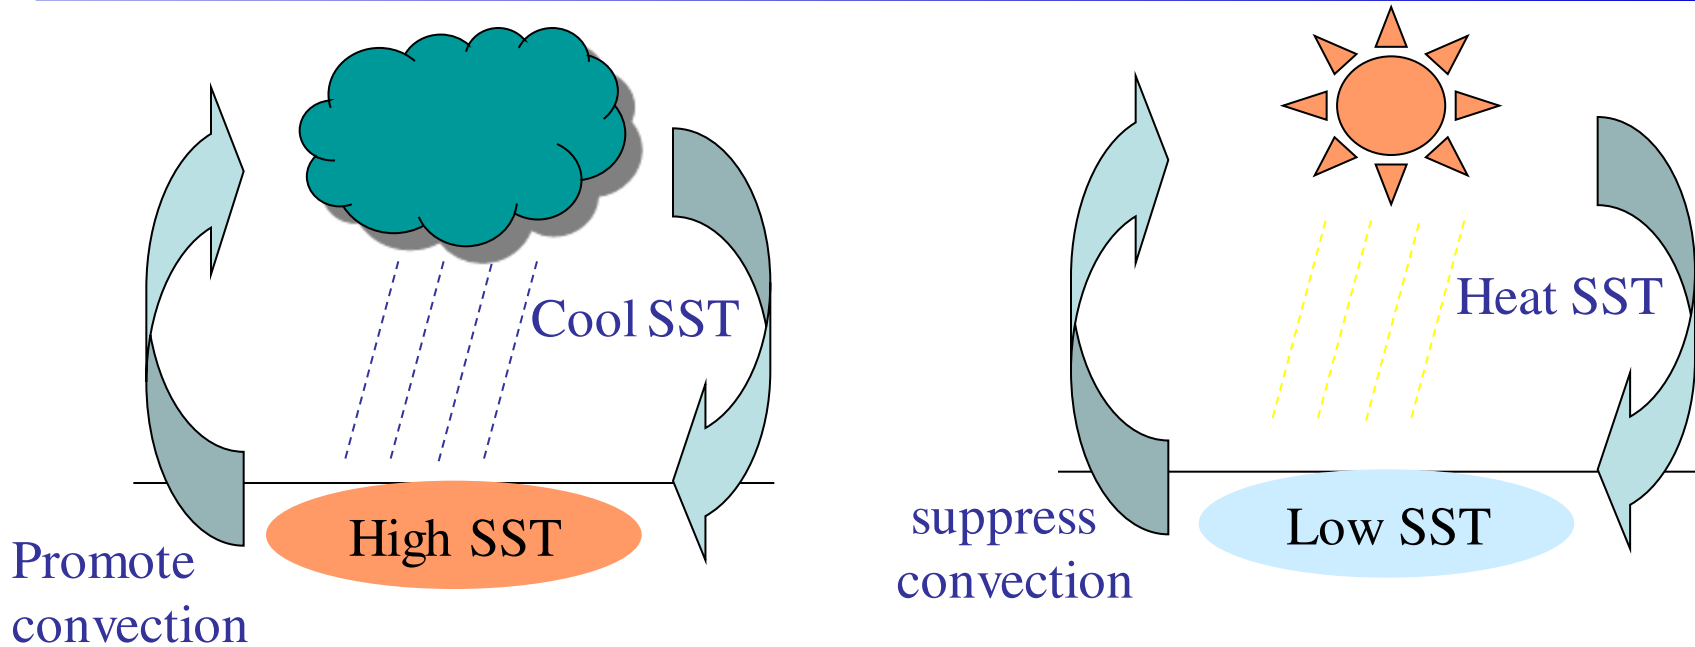

Coupled data assimilation uses constraints to inhibit rainfall over high SST regions, so salinity fields follow observations.



# Contribution to ocean data assimilation: atmos / land hydrology → salinity budget

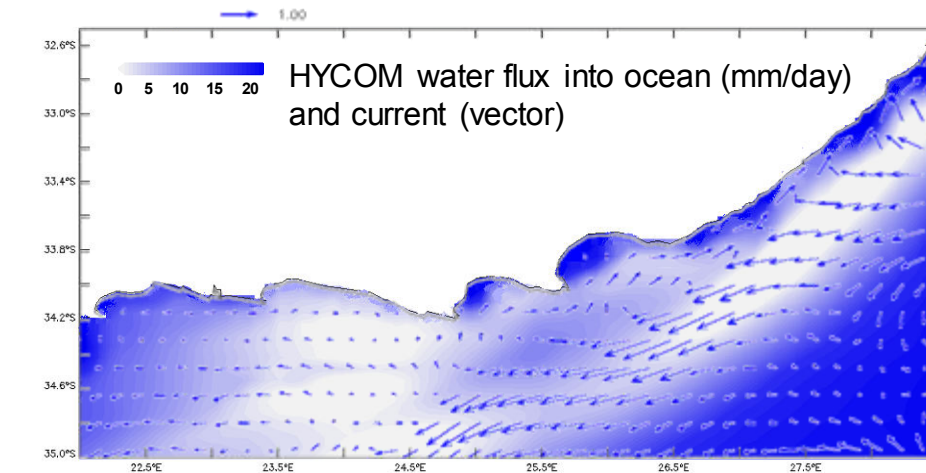

- Atmospheric data assimilation generates rainfall
- Over-land run-off feeds into river catchments, combined with satellite soil moisture
- Coastal river discharge is diffused and advected by winds, waves, turbulence and currents
- Salinity fields incorporate satellite and in-situ measurements, thus effects of upwelling

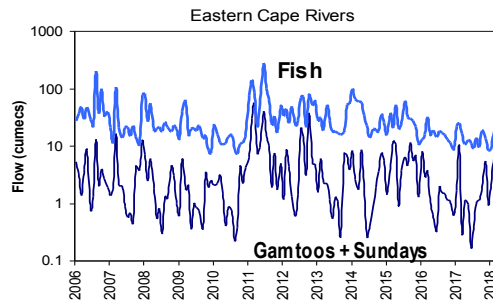

Public DWA hydrology data

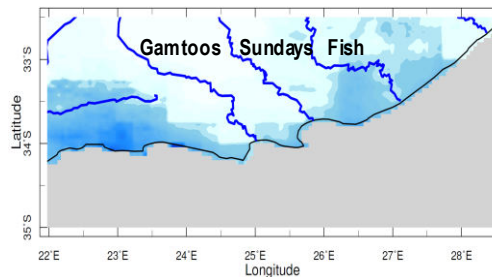

Meteosat-blended gauge data

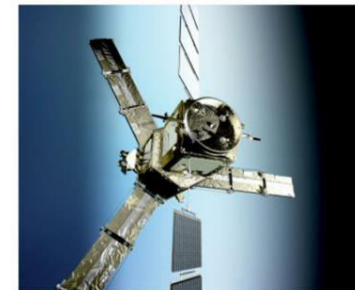

Soil Moisture and  
Ocean Salinity  
Satellite (SMOS)

# Examples of Amazon plume and Agulhas Current

Sea Surface Salinity (psu) from OCEAN5 analysis on 20180913

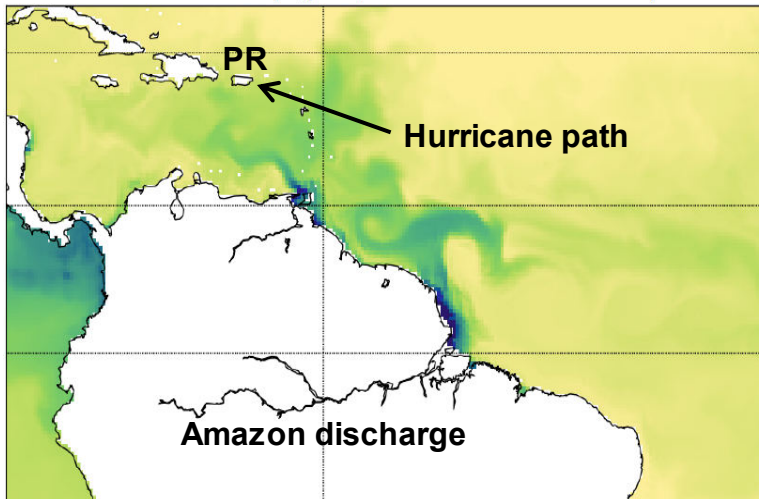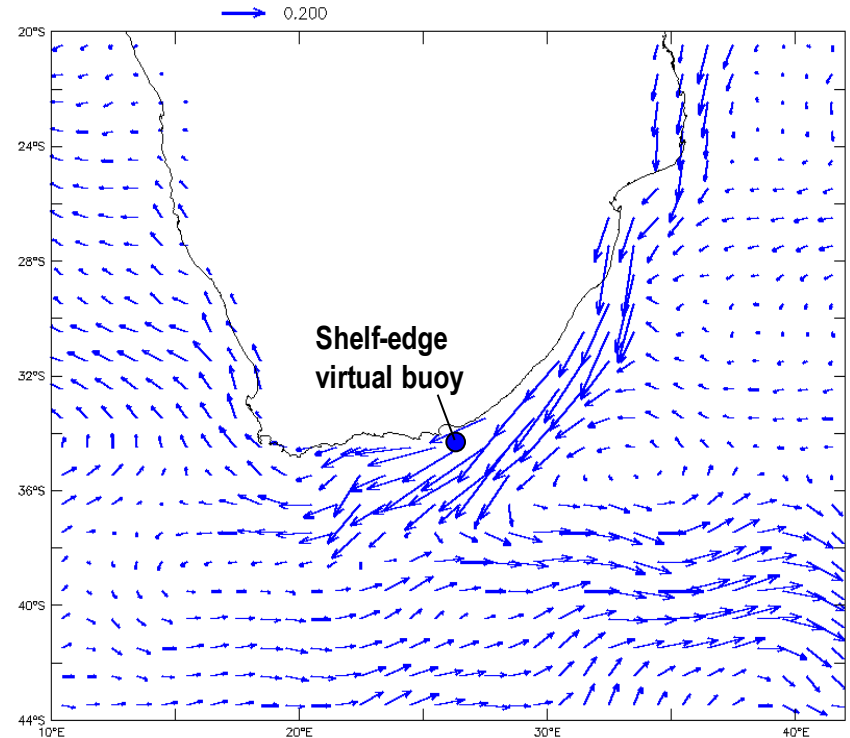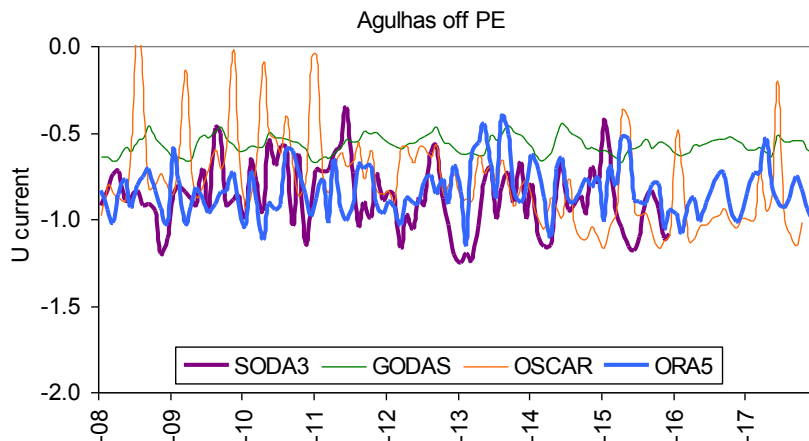

time-series since 2008: agreement for SODA3 & ORA5, but GODAS & OSCAR show weakness & discrepancies

# Vanishing sea ice

and shrinking beaches?

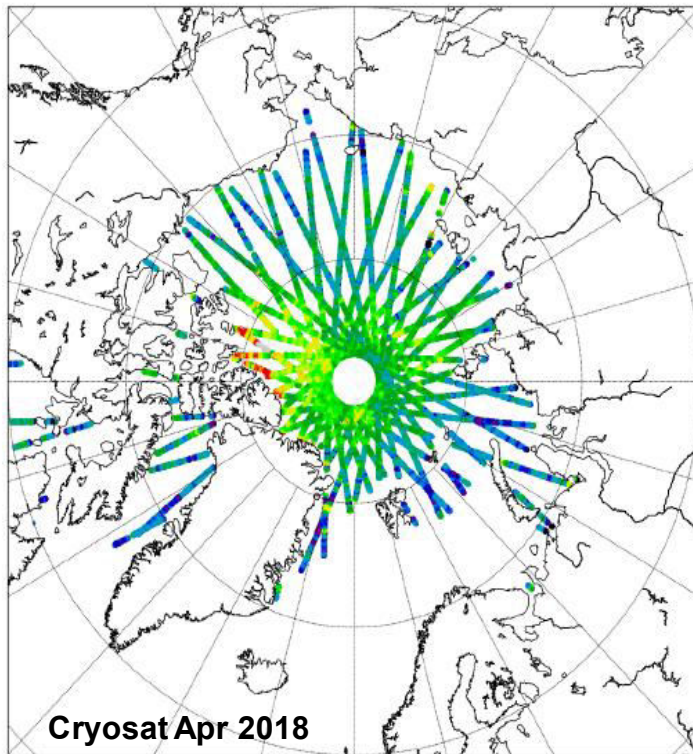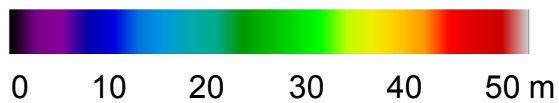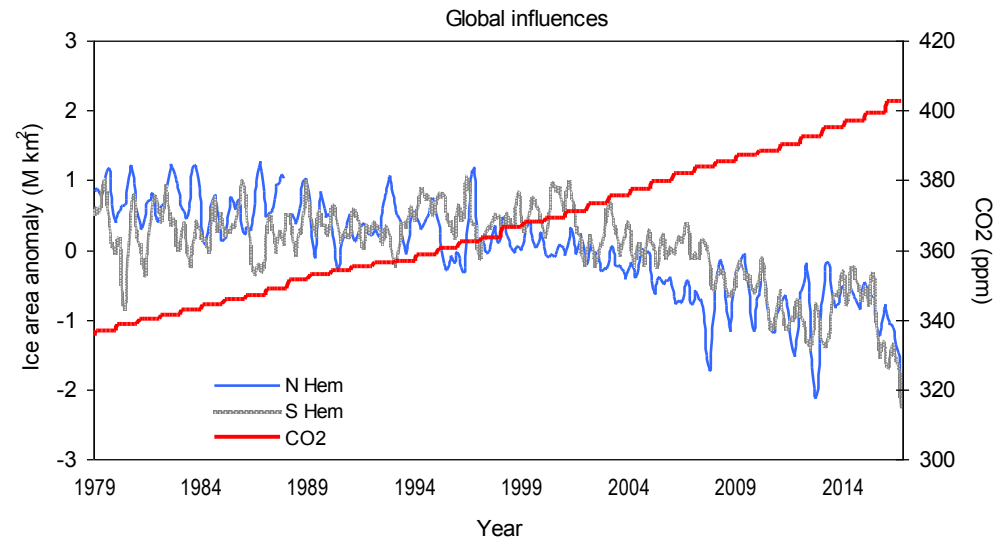

# Comparison of past & future: consistent values and trends?

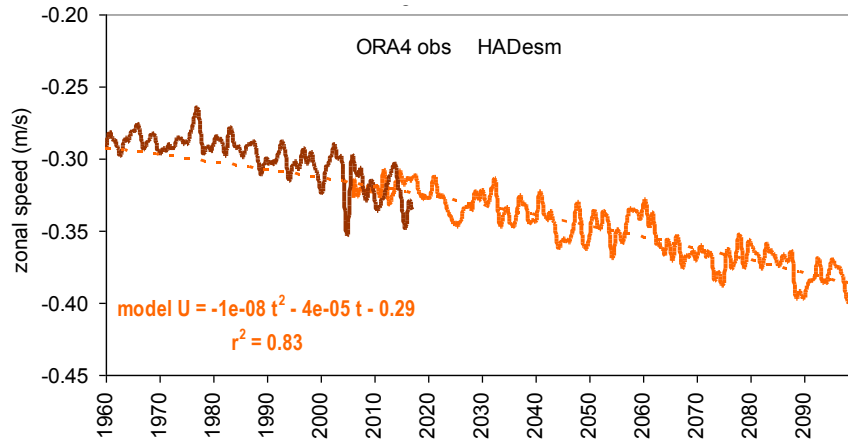

- PE shelf time series of ECMWF-ora4 hindcast and HAD-esm projected 1-50 m zonal current.

For periods of overlap between observed and projected data, confidence can be determined according to means, variance, annual cycle, trends, and other metrics

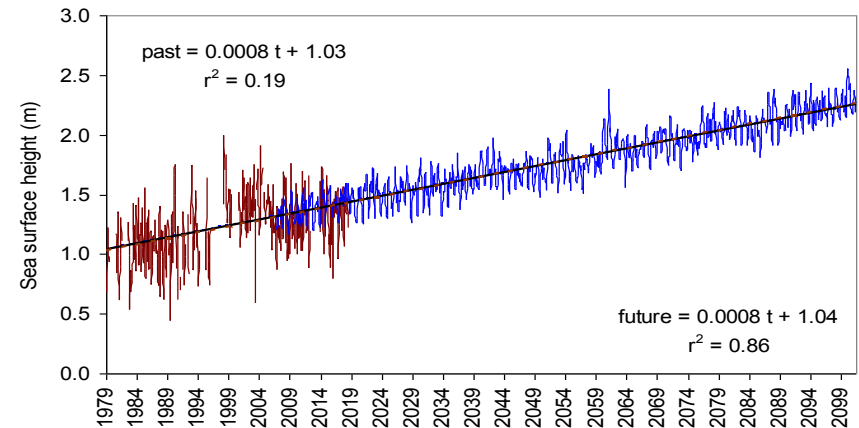

- Gauge measured and HAD-esm projected sea surface height at PE harbour.

# Local validation studies

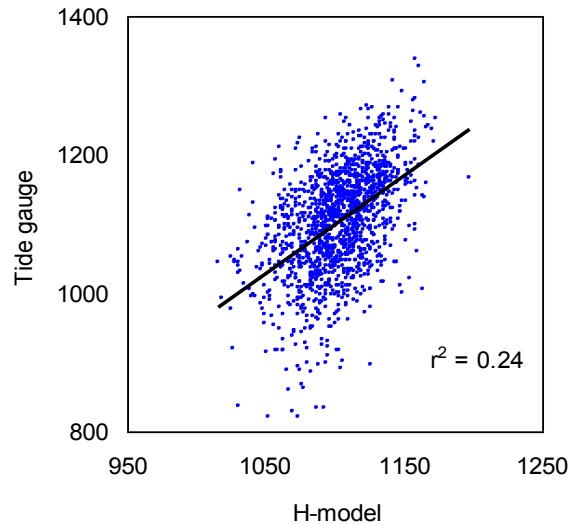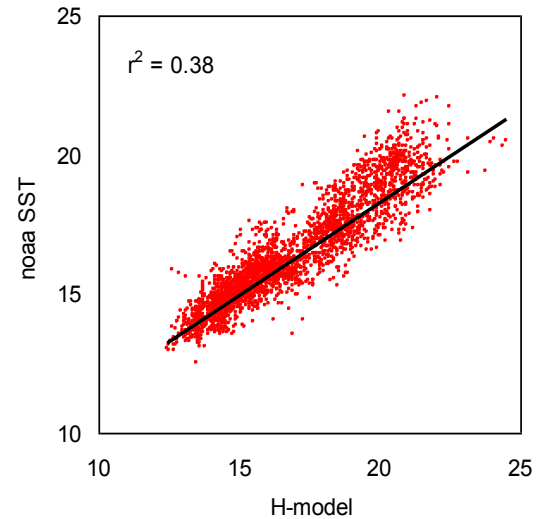

- Comparison of daily HYCOM model at nearest grid-point and: (left) sea surface height from tide gauge in western False Bay and (right) sea surface temperature from NOAA satellite; 2008-2015

# HYCOM ability to detect temp gradients within False Bay

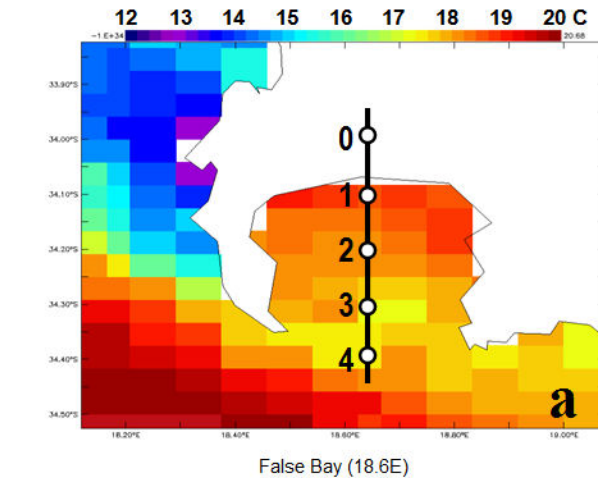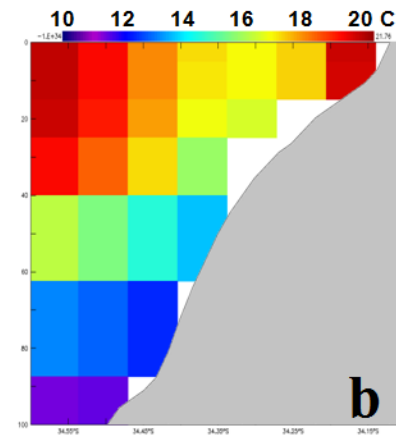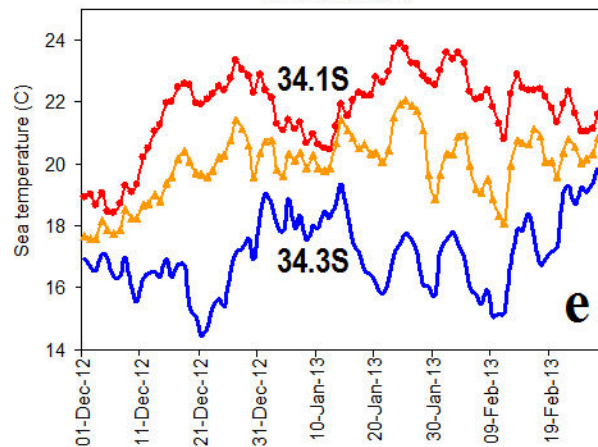

Dec12-Feb13  
averages

ASCAT ability to detect  
climate shift in False Bay

Daily data 2008-2016

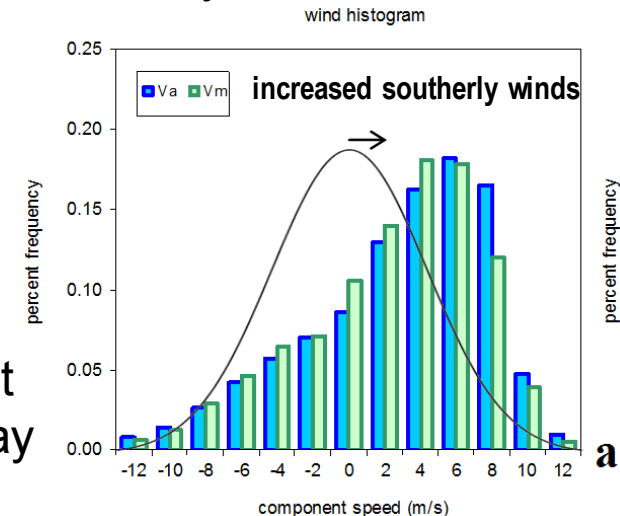



# Intercomparison of products: 3-day SST ~1 Jan 2013

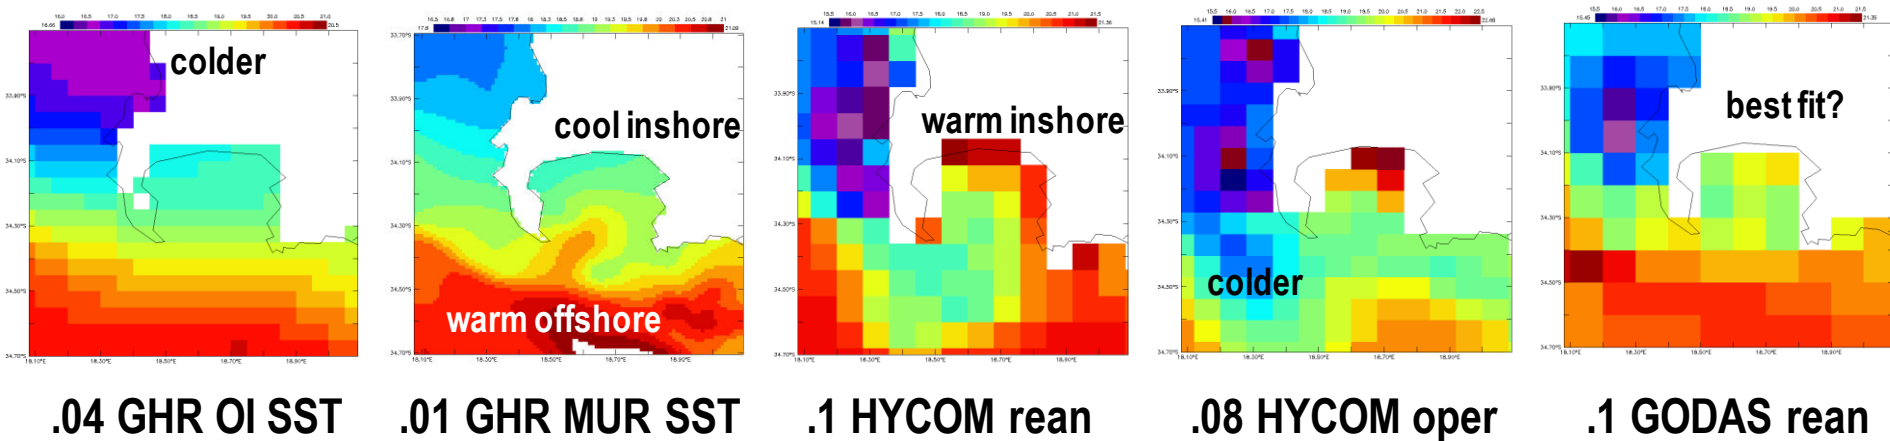

Hi-res ocean reanalyses should converge over time, as optimal solutions are achieved for radiometer engineering, atmospheric correction, bias removal and coupled DA.

Low-res pattern

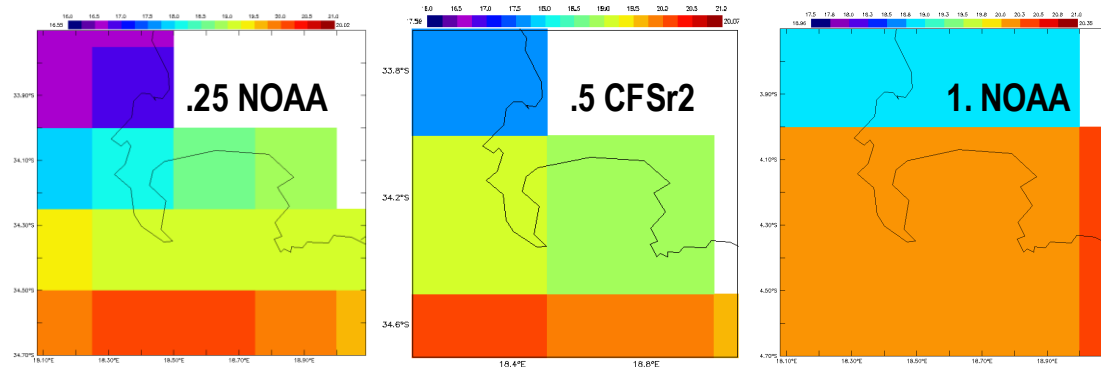

# Remote sensing of productivity

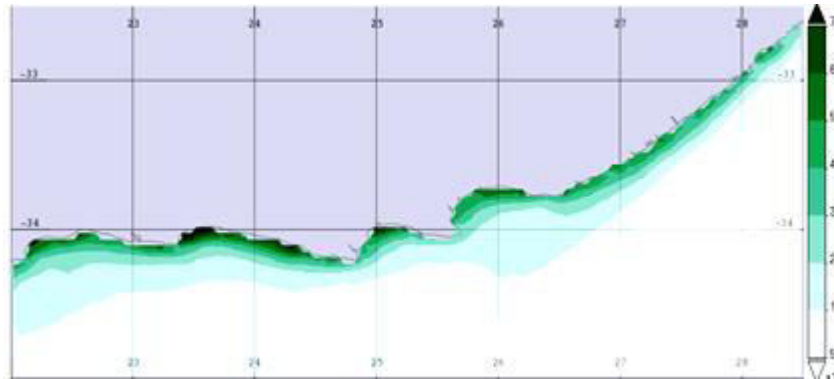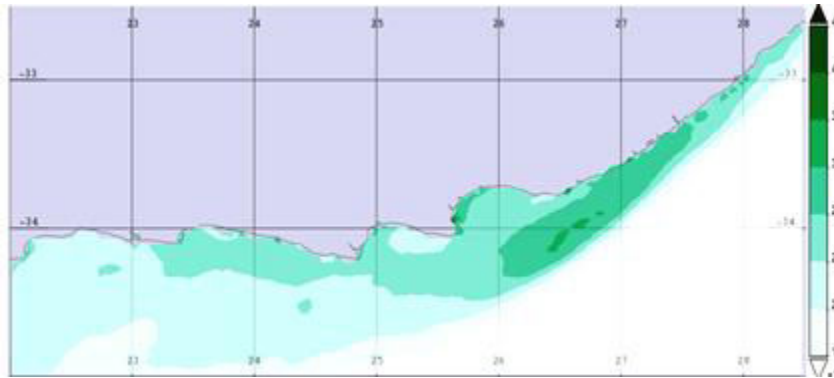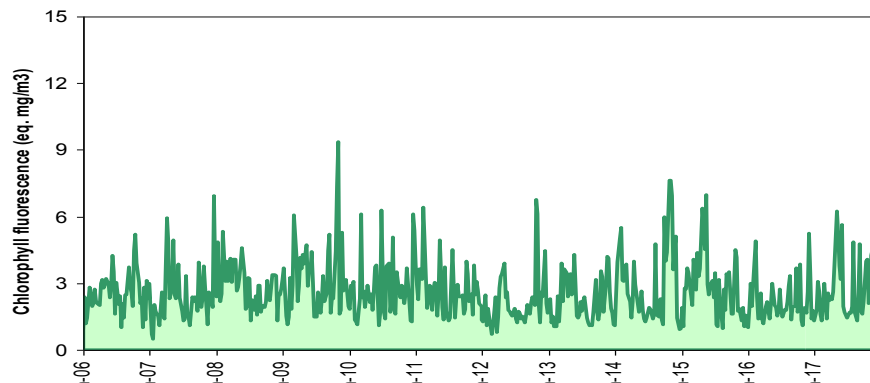

What is the appropriate visible band product for marine productivity?

green-band chlorophyll?

Or

red-band fluorescence?

Influence of salinity, turbidity?

Why choose?

Use the reanalysis concept:  
all obs have value, so blend.

Retain multi-day time-scale  
for composite de-clouding.

# Local validation studies

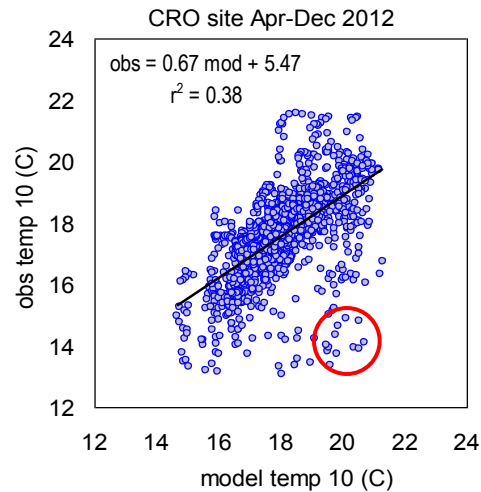

warm bias

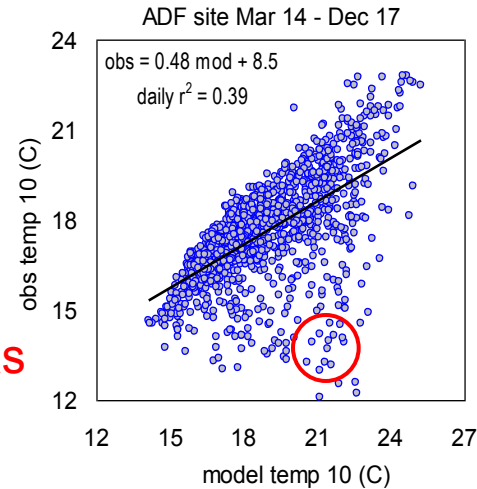

- Inter-comparison of HYCOM model 10 m temperature and UTR data at Algoa buoys (y-axis).

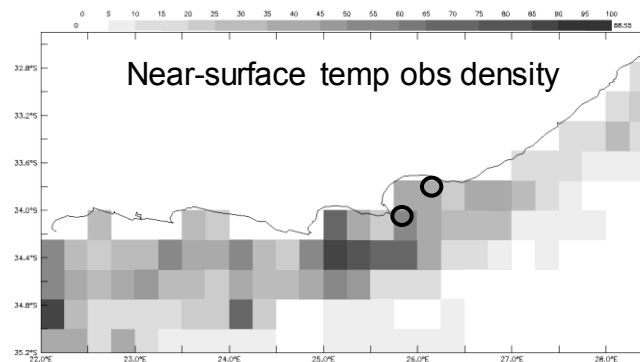

# Local validation studies

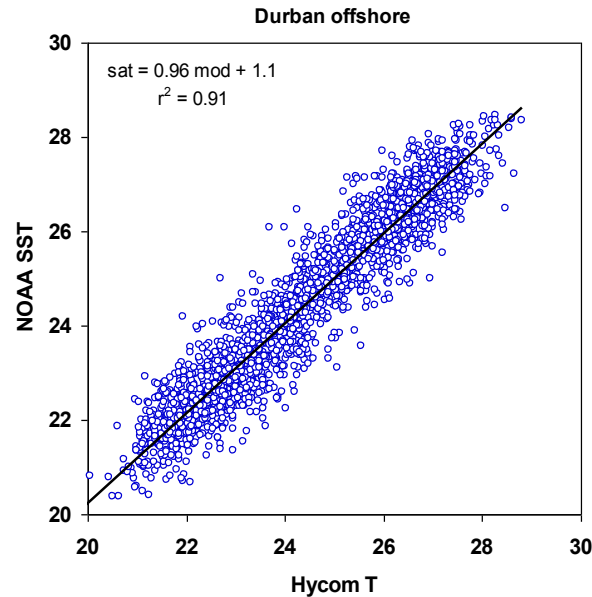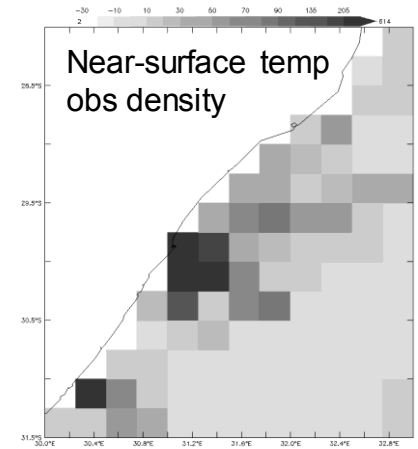

- Comparison at shelf-edge of Hycom and NOAA sea surface temp 2009-2015 off Durban.

# Local validation studies

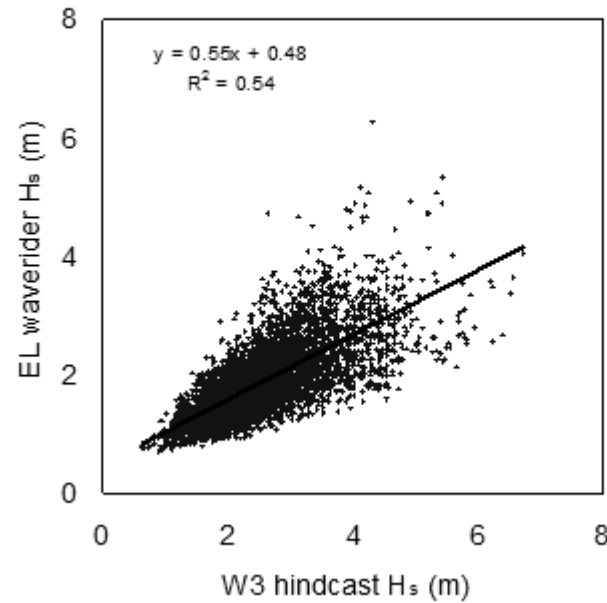

- Comparison of 3-hourly waverider buoy and W3 model significant wave height (2011-2013) near East London.

# Local intercomparisons

Over the shelf, west of PE

## Coastal gradient in SADC0 ships data

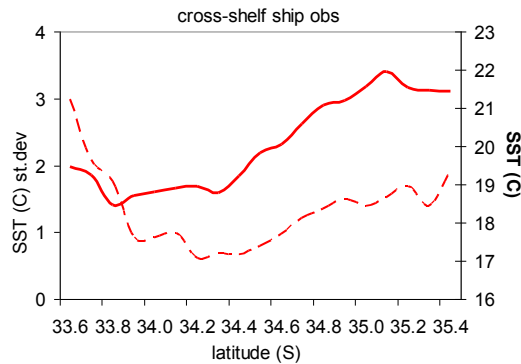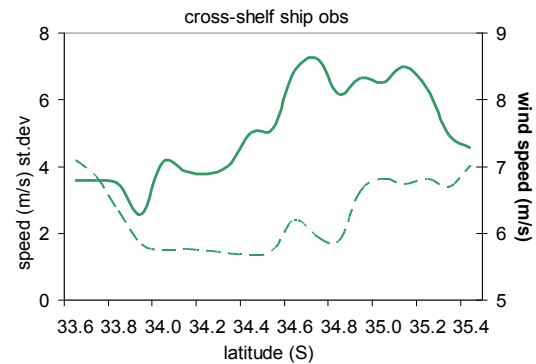

SST

Zonal wind

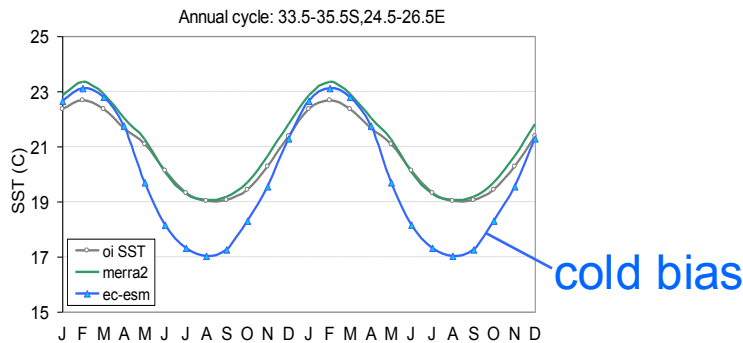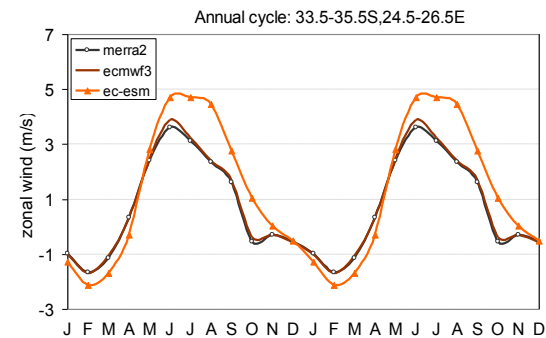

Seasonal cycle in satellite, reanalysis and coupled model

# Changes in variance over time

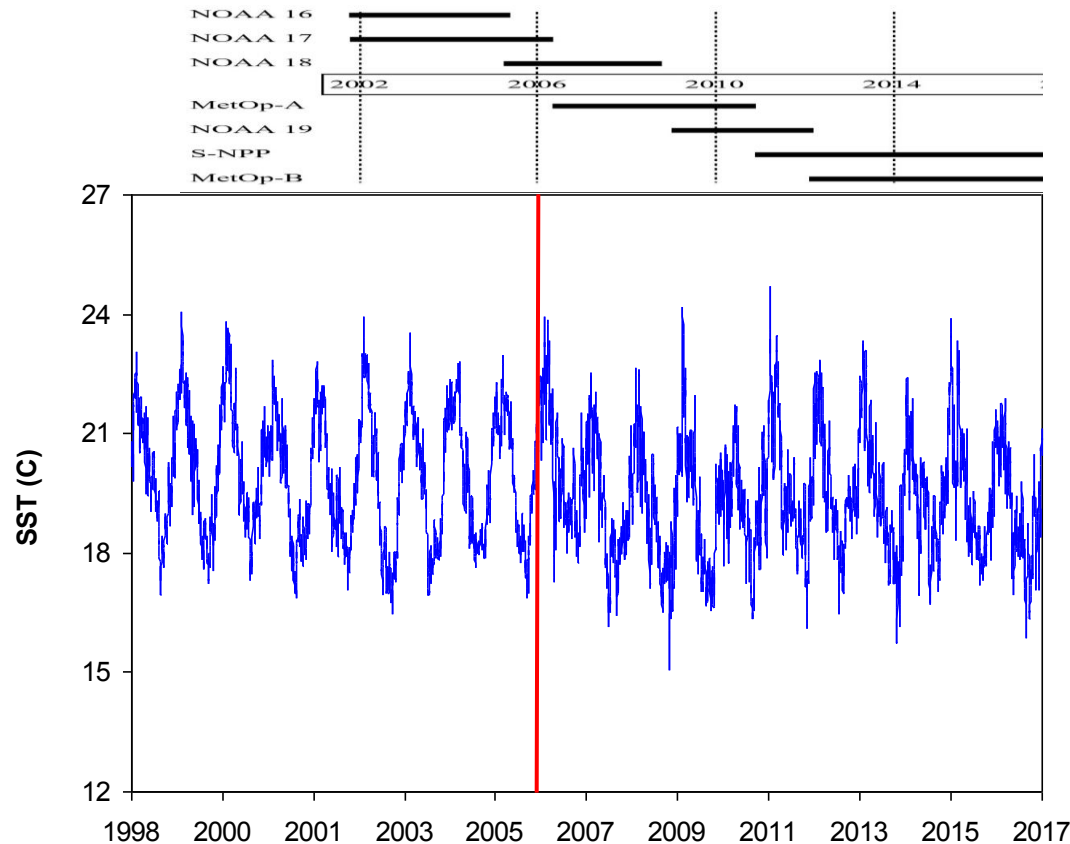

Daily SST over the shelf west of PE:

Temporal variability dominated by seasonal cycle pre-2006.

Event scale fluctuations much greater thereafter.

Increased 'noise' from inshore upwelling, finally resolved.



# Globally available resources:

most starting in the satellite era

| LABEL  | DEFINITION                                             | RESOLUTION            | SOURCE              |
|--------|--------------------------------------------------------|-----------------------|---------------------|
| CCMP   | Cross-calibrated multi-platform marine wind reanalysis | 25 km                 | Univ Hawaii APDRC   |
| CFSr2  | Coupled Forecast System reanalysis v2 (ocean)          | 30-50 km              | Univ Hawaii APDRC   |
| ECMWF5 | European Centre Medium-range Weather Forecasts         | 30 km                 | Climate Explorer    |
| GODAS  | Global ocean data assimilation system (NOAA)           | 50 km                 | IRI Clim. Library   |
| HYCOM  | Hybrid Coordinate Ocean Model                          | 10 km                 | Univ Hawaii APDRC   |
| IPCC   | Coupled model projections (HAD3esm, etc)               | 100+ km               | Climate Explorer    |
| MERRA2 | Modern Era Reanalysis for Research and Applications    | 50 km                 | NASA-giovanni       |
| MODIS  | Moderate-imaging Infrared Spectrometer                 | 1-4 km                | IRI Clim. Library   |
| NASA   | National Aeronautics and Space Administration          | 25-100 km (satellite) | NASA-giovanni       |
| NCEPr2 | National Centers for Environmental Prediction          | 180 km (reanalysis)   | IRI Clim. Library   |
| NOAA   | National Oceanic and Atmospheric Administration        | 50 km                 | IRI Clim. Library   |
| ORA5   | Ocean Reanalysis v5 from ECMWF                         | 25 km                 | Univ Hawaii APDRC   |
| SODA   | Simple Ocean Data Assimilation (UMD, Carton)           | 50 km                 | IRI Clim. Library   |
| W3     | Wavewatch v3 ocean swell reanalysis                    | 50 km                 | Univ Hawaii PacIOOS |
| WHOI   | Woods Hole Ocean Inst (surface fluxes)                 | 50 km                 | Univ Hawaii APDRC   |

See also: <https://reanalyses.org/ocean/overview-current-reanalyses>

## Value of higher resolution and operational reporting

- Products of monthly time-scale and spatial resolution  $> 0.5^\circ$  can not resolve the shelf environment and its fluctuations
- HYCOM  $0.1^\circ$  resolves the coastal gradient, and shelf-edge eddies and rings at daily time scale
- CFSr2 and MERRA2 hourly reanalysis resolve diurnal variability at  $0.5^\circ$  resolution, ECMWF5 available at  $0.3^\circ$  resolution
- Confidence in these products is diminished by the scarcity of in-situ marine reports over the South African shelf
- Global ocean data assimilation will proceed with or without us
- More emphasis is needed on real-time measurement and reporting
- So satellite and model products are calibrated toward reality,
- And able to be trusted for use, not only in research, but in strategic decision-making

# What is the solution?

exchange of emails

- **From: Mark R Jury 1 Feb 2019 To: T.Morris <weathersa.co.za> [SAWS Marine Coordinator]**
- **QUESTION - I ask how SAWS interacts with SA marine scientists to pass on real-time ocean data collected in our EEZ, for operational and coupled model [assimilation and prediction]?**
- **ANSWER - ...the team are planning to address these [non-reporting] issues, [possibly with parallel monitoring systems that duplicate those 'missing', such as harbour buoys and tide gauges].**
- **REPLY - ...the IOC website shows that all SA marine platforms are off-line. Could you make it part of your group's responsibility to get the data back online?**
  
- **3 Feb 2019 To: C.Rautenbach <weathersa.co.za> [SAWS Marine Dept]**
- **QUESTION - ...path to operational oceanography. I was wondering what existing [marine] data could be [fed] to ocean models used in coupled forecasts? SAEON has quite a few buoys, and could report through SAWS GTS? Same for any data [reaching] SADCO...**
- **ANSWER - ...we are having negotiations to add a variety of marine data to our regular GTS reports**
  
- **21 Feb 2019 To: K.Wilmer-Becker <metoffice.gov.uk> [GODAE Programme Coordinator]**
- **QUESTION – I want to know how much of South Africa's marine observations are reaching the global ocean DA system on an operational basis?**
- **26 Feb 2019 ANSWER - CMEMS Service Desk <mercator-ocean.eu>**  
**[According to the] Copernicus insitu expert team ...we don't have [any] platforms identified as coming from South Africa [over the most recent DA cycle]: 7 ships, 2 drifting buoys, 4 argo floats, 12 tagged fish. All of them are moving platforms [of external origin]...**
- **REPLY - ...in case of 'privatized' data that requires confidentiality... is it possible to 'flag' reports, so to assimilate but keep actual data 'hidden'?**
- **ANSWER - Yes, that is an option many services are using: [ECMWF, UKMET, METEO-FRANCE, etc].**

# How we solve the problem in Puerto Rico

- NOAA contracts the university to provide operational data monitoring and real-time reporting (CARICOOS)
- Graduate students engaged to do much of the work under supervision of professors
- Contract is on-going and stipulates 99% data capture, has budget for maintenance, replacement equipment, bursarys / internships.
- All data are required to be publicly available within 1 hour of collection, mirrored on government websites, with data QC and assimilation handled by quasi-government ocean, land & weather services and NOAA subsidiaries (US-Navy, USGS, etc).
- The university does not conduct in-house data assimilation, that is the work of major centers, given the need for blending with vast amounts of NASA satellite measurements. We maintain the observing & reporting system, and evaluate / validate the DA model outputs.

# Puerto Rico's operational system

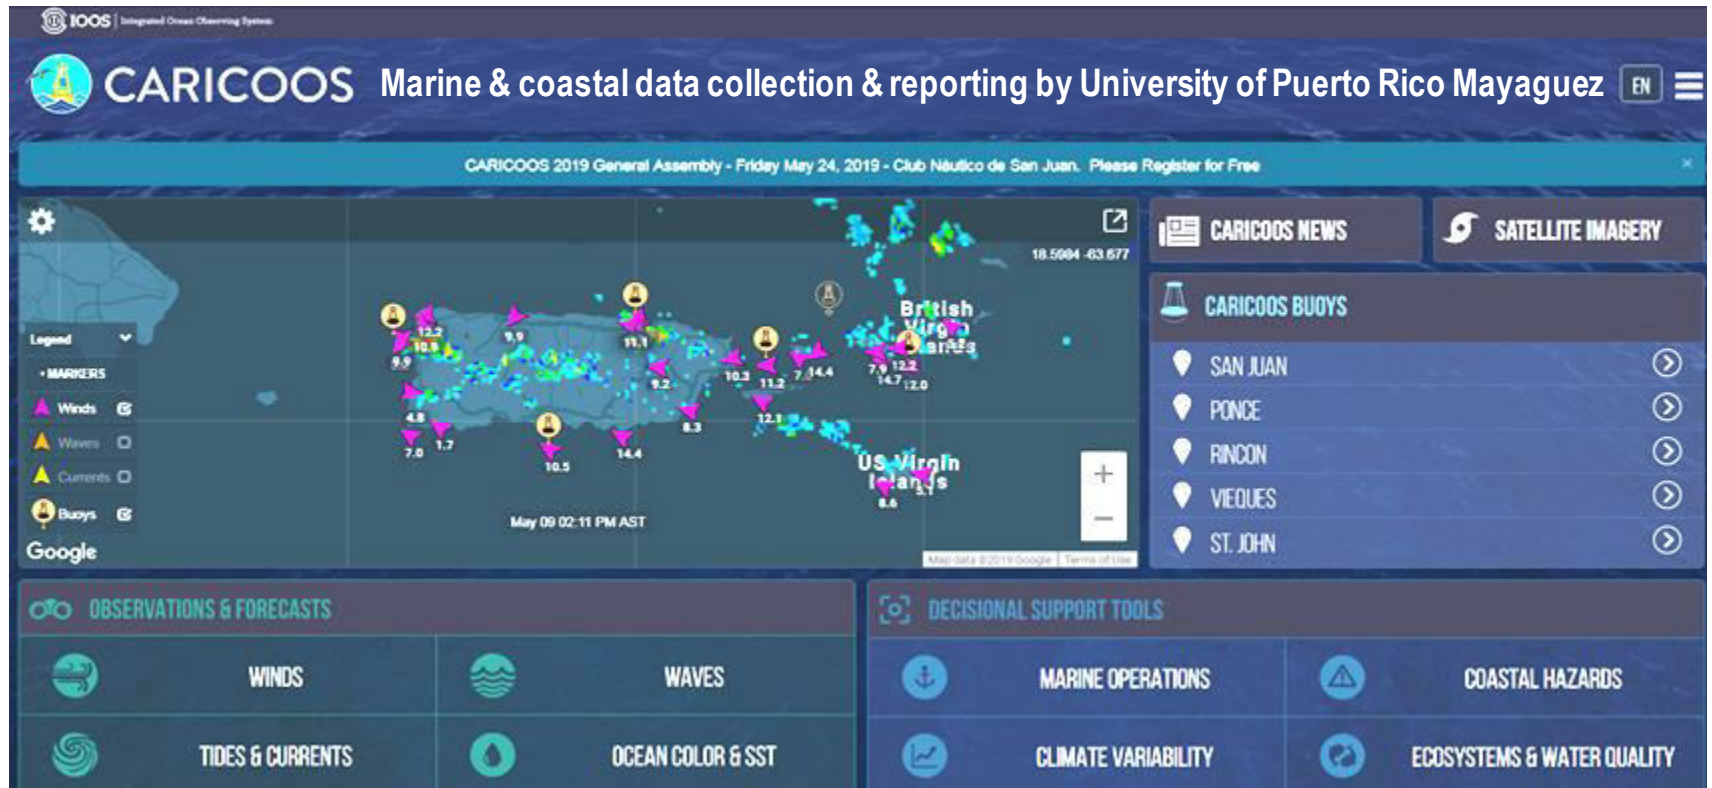

Caricoos marine monitoring system

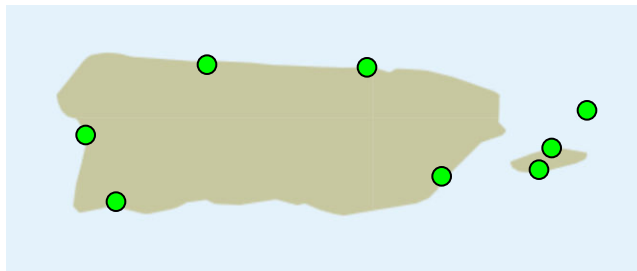

IOC mirror site

Actual and virtual buoys

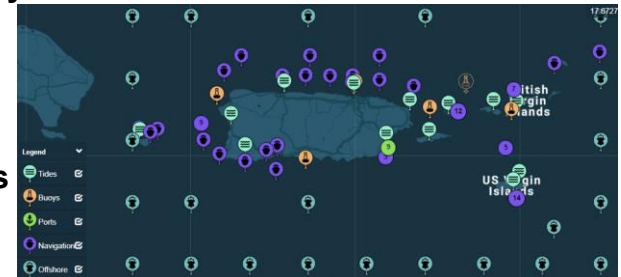

# Puerto Rico's operational system

PR economy similar to South Africa, except many jobs are automated, all data are publicly available.

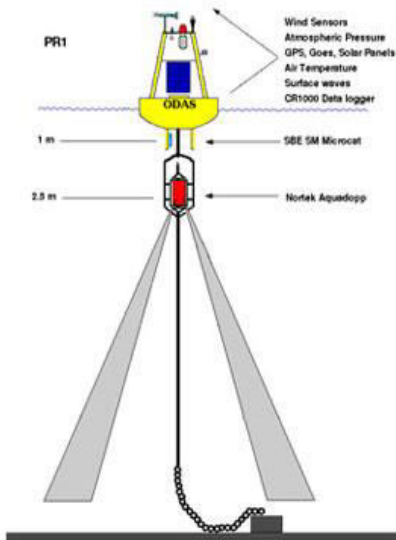

NDBC moored buoy + wx station, with hourly real-time data since 2000+

University researchers assist gov. operations via graduate intern field work, identification of 'bad' obs & systematic DA model errors, applied research theses, publications, outreach.

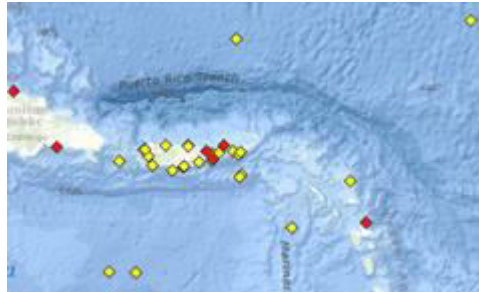

NDBC buoys around Puerto Rico

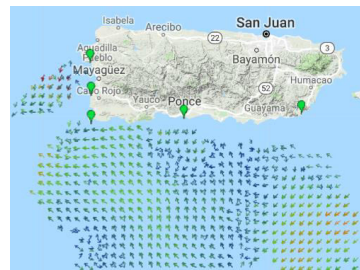

HF radar currents

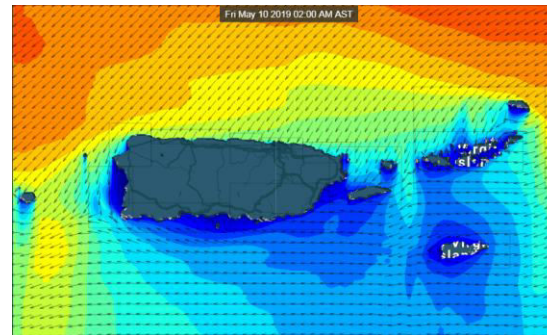

Waves

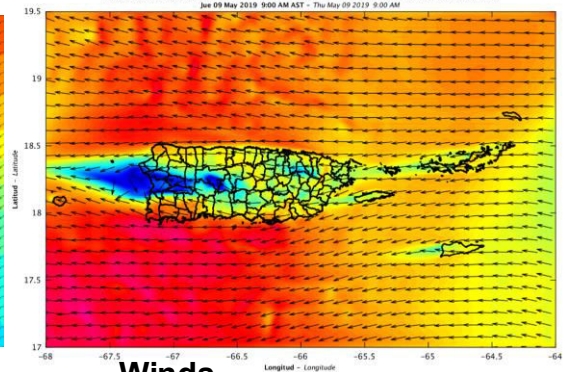

Winds

nested model outputs – daily update  
downscaled from operational products

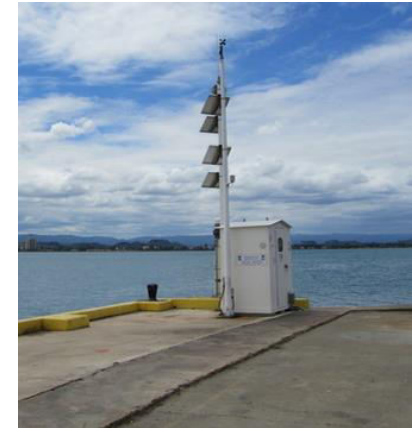

Tide gauge maintained since 1962

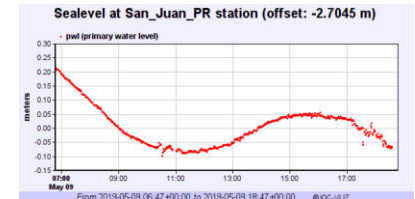

Sea level at San Juan PR station (offset: -2.7045 m)



# Puerto Rico's operational system

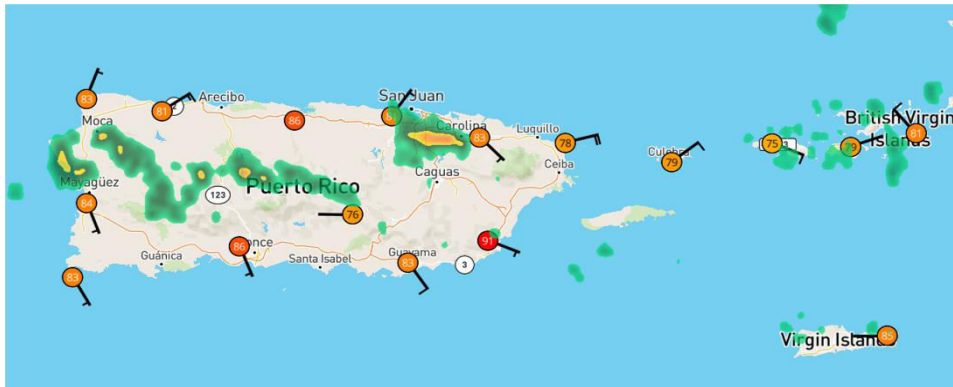

**Real-time reporting weather stations, via Wundermap, with 10 minute update, most derive from quasi-government services**

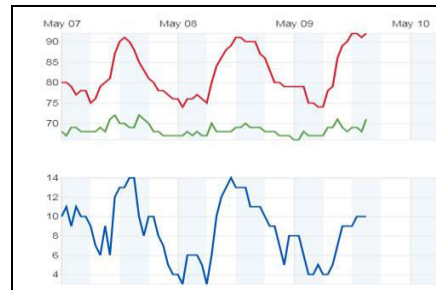

## Cabo Rojo Puerto Rico May 2019

| Day of Month      | Day of Year | Total Solar Rad. ly. | Wind Ave. V. mph | Wind Dir. Deg | Air Temperature Mean Deg. Fahrenheit | Air Temperature Max Deg. Fahrenheit | Air Temperature Min Deg. Fahrenheit | Humidity Mean Percent | Humidity Max Percent | Humidity Min Percent | Dew Point Deg. Fahrenheit | Wet Bulb Deg. Fahrenheit | Total Precip. inches | Total Penman ET. inches |      |
|-------------------|-------------|----------------------|------------------|---------------|--------------------------------------|-------------------------------------|-------------------------------------|-----------------------|----------------------|----------------------|---------------------------|--------------------------|----------------------|-------------------------|------|
| <a href="#">1</a> | 121         | 594                  | 14.5             | 103           | 37.0                                 | 82                                  | 89                                  | 76                    | 67                   | 79                   | 50                        | 69                       | 72                   | 0.00                    | 0.29 |
| <a href="#">2</a> | 122         | 460                  | 13.7             | 103           | 32.0                                 | 81                                  | 87                                  | 77                    | 68                   | 81                   | 56                        | 69                       | 72                   | 0.00                    | 0.23 |
| <a href="#">3</a> | 123         | 514                  | 13.0             | 96            | 30.0                                 | 80                                  | 86                                  | 73                    | 64                   | 78                   | 49                        | 67                       | 70                   | 0.00                    | 0.25 |
| <a href="#">4</a> | 124         | 513                  | 12.8             | 106           | 27.0                                 | 80                                  | 86                                  | 75                    | 64                   | 74                   | 50                        | 67                       | 70                   | 0.00                    | 0.26 |
| <a href="#">5</a> | 125         | 573                  | 16.3             | 105           | 35.0                                 | 81                                  | 87                                  | 76                    | 67                   | 75                   | 54                        | 69                       | 72                   | 0.00                    | 0.28 |
| <a href="#">6</a> | 126         | 573                  | 15.2             | 108           | 30.0                                 | 81                                  | 86                                  | 76                    | 70                   | 76                   | 57                        | 70                       | 73                   | 0.00                    | 0.27 |
| <a href="#">7</a> | 127         | 590                  | 15.0             | 106           | 33.0                                 | 81                                  | 85                                  | 76                    | 68                   | 76                   | 57                        | 69                       | 72                   | 0.03                    | 0.27 |

**Both ocean and weather services feed to GTS, to ensure real-time reporting to global centers for data assimilation, within atmospheric cut-off window (3 hr)**

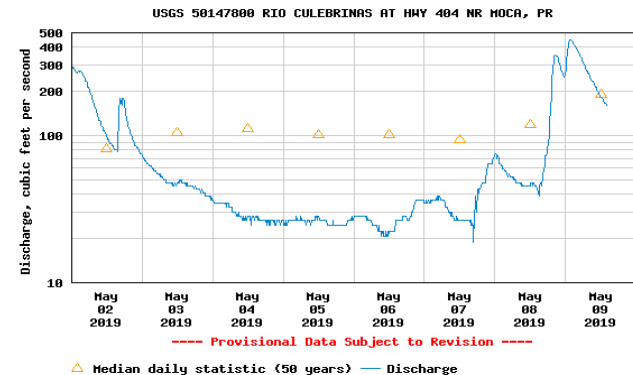

## Daily Streamflow Conditions

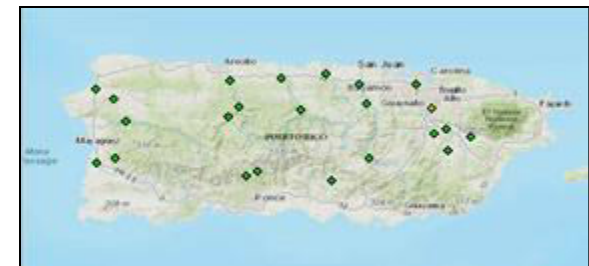

**Real-time reporting streamflow gauges, with 10 minute update: the flash-flood warning system linked to wx radar**

# Value of coupled forecasts

- We used to think that coupled modelling was needed only for long-range predictions (> 2 month lead time) driven by alternating ENSO phase and accumulating greenhouse gases.
- With the advent of hourly-fluctuating, eddy-resolving ocean and land products, it is evident that short-range predictions (> 2 day lead time) out-perform uncoupled forecasts.
- Coupled models better simulate the diurnal cycle of rainfall and wind speed\*, changes in tropical cyclone intensity, etc.
- There is a single assimilation system for environmental data; and converging model technology for land, ocean, atmosphere (both physical and chemical).
- Long-range predictions for South Africa summer climate show increasing skill, via ENSO influence on slow undulations of the ocean thermocline that modulate atmospheric convection and circulation.
- But model-simulated fields, mainly derived from satellite estimation, need local calibration (error-constraints) for operational use.

ECMWF5 max temp Dec 2018

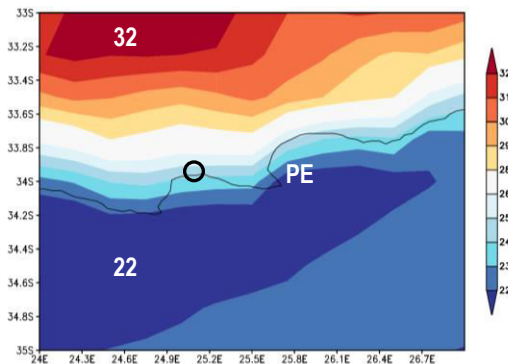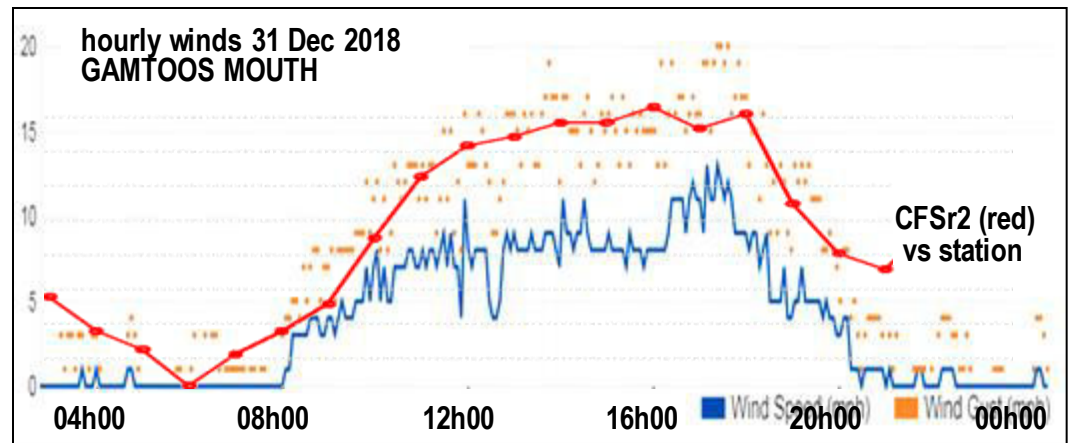

Supplement: Supplementary file [file os-2020-44-AC4-supplement.pdf]
