# Supplementary material for: Marine climate change over the eastern Agulhas Bank of South Africa
Source: Copernicus journal article supplement (doi:10.5194/os-2020-44), 2020-07-08
Supplement: Supplementary file [file os-2020-44-AC5-supplement.pdf]

# Marine climate change over the eastern Agulhas Bank of South Africa

Mark R Jury

Geography Dept, University of Zululand, KwaDlangezwa 3886, South Africa  
and Physics Dept., University of Puerto Rico Mayaguez, USA, 00681

[re-submitted to EGU ocean Sci Oct4 June 2020](#)

## Abstract

The rate of change in the marine environment over the eastern Agulhas Bank, along the south coast of South Africa (32-37S, 20-30E) is studied using reanalysis observations 1900-2015 and coupled ensemble model projections 1980-2100. Outcomes are influenced by resolution and time-span: ~1 degree datasets covering the whole period capture large-scale changes, while ~0.5 degree datasets in the satellite era better distinguish the cross-shelf gradients. Although sea surface temperatures offshore are warming rapidly ( $.05^{\circ}\text{C}/\text{yr}$  since 1980), a trend toward easterly winds and a locally stronger Agulhas Current have intensified near-shore upwelling ( $-.03^{\circ}\text{C}/\text{yr}$ ). The subtropical ridge ~~is gradually moving during summer is drawn~~ poleward, ~~leading to a by global warming and high phase southern oscillation index. Cooler inshore sea temperatures suppress latent heat flux and contribute to coastal desiccation ( $-.005\text{ mm day}^{-1}/\text{yr}$ ) and vegetation warming ( $.1^{\circ}\text{C}/\text{yr}$ ) since 1980. Coupled ensemble projections from the Hadley and European models indicate that the shift toward drier~~ climate weather and easterly winds may be sustained through the 21<sup>st</sup>-century.

Key words: South African, coastal climate change

mark.jury@upr.edu

## 29 Introduction

30 The marine climate of the eastern Agulhas Bank along the south coast of South Africa is  
31 shaped by the continental plateau and sub-tropical latitude. Rainfall tends to be limited and shelf  
32 waters are characterized by sharp gradients between inshore upwelling and an offshore current that  
33 advects warm water polewards at ~1 m/s (Lutjeharms et al. 2000). Downstream widening of the  
34 shelf and cyclonic shear causes uplift at the shelf edge (Schumann et al. 1982, Lutjeharms 2006,  
35 Goschen et al. 2015, Malan et al. 2018). Westerly and easterly wind regimes during winter to  
36 summer respectively induce alternating spells of downwelling and upwelling (Schumann and  
37 Martin 1991, Schumann 1999). Numerous small rivers discharge into the shelf zone (Schumann and  
38 Pearce 1997, Scharler and Baird 2005, vanBladeren et al. 2007). The inshore environment and large  
39 embayments (Fig 1a) are characterized by weak circulations and seasonal warming, and become  
40 stratified and productive during austral summer (Roberts 2010, Pattrick et al. 2013). The Agulhas  
41 Current meanders a few times per year (Goschen and Schumann 1990, Rouault and Penven 2011),  
42 while the mid-latitude jet stream meanders a few times per month advecting coastal lows and  
43 continental shelf waves along the shelf (Jury et al. 1990, Schumann and Brink 1990). Amidst these  
44 rapid changes are rising sea levels (Mather et al. 2009; ~~Jury 2018~~) and longer summers.

45 The eastern Agulhas Bank shows trends toward offshore warming and inshore cooling due  
46 to wind- and current-induced upwelling, and retreat of the circumpolar westerlies (Rouault et al.  
47 2009, Durgadoo et al. 2013, Hutchinson et al. 2018). Trends in air temperatures are near the global  
48 average ~~Past research has found trends~~ of .02°C/yr (Kruger and Shongwe 2004, Morishima and  
49 Akasaka 2010, Jury 2013), ~~but~~ ~~however~~ trends in other variables show multi-year fluctuations  
50 (Philippon et al. 2012) from ~~tend to be over shadowed by~~ regional atmosphere coupling with sea  
51 surface temperatures (SST) and the Pacific El Niño Southern Oscillation (ENSO). Climate  
52 changes ~~short term analyses of events and the sparsity of data before 1950~~ (Tadross et al. (2005),

53 MacKellar et al. (2014) ~~and~~; Kruger and Nxumalo (2017) offer guidance on ~~-~~resource management,  
54 which this research seeks to extend.

55 The main objective of this ~~study~~research is to establish the rate and pattern of observed and  
56 projected marine climate (land, air, sea) trends along the south coast of South Africa from 1900 to  
57 2100. Scientific questions include: 1) How has the wind field responded to a poleward shift of the  
58 subtropical ridge, ~~and how does that affect the shelf temperature and currents?~~ 2) What are the con-  
59 sequences of intensified ~~If the coastal ocean is cooling due to wind and current driven~~ upwelling,  
60 in contrast with the offshore environment — what are the consequences for the local heat and water  
61 budget? 3) How does record length and dataset resolution affect the result? and 4) Wwhat is the  
62 impact of climate variability (~~eg. El Niño Southern Oscillation, ENSO~~) on trend attribution? While  
63 the spatial focus is on the south coast of South Africa using monthly datasets finer than 0.5° during  
64 the satellite era, context is provided at the large-scale using coarser model products over the 20<sup>th</sup>  
65 and 21<sup>st</sup> centuries.

Formatiert: Hochgestellt

Formatiert: Hochgestellt

## 66 Data and Methodology

67 Modern data assimilation systems blend in-situ and ancillary measurements by iterating be-  
68 tween climatology, persistence and theory, interpolating across gaps in time and space, and limiting  
69 the influence of outliers. By reducing uncertainties, scientists now have a reliable means to evaluate  
70 trends in marine climate. The monthly reanalysis products employed here include: ECMWF~~v5-int~~  
71 atmosphere coupled (Dee et al. 2011), ECMWF-20c atmosphere (Poli et al. 2016), ECMWF-ora4  
72 ocean (Balmaseda et al. 2013), NASA MERRA-2 coupled atmosphere (Gelaro et al. 2017), NCEP  
73 CFSr-2 coupled (Saha et al. 2010), SODA-3 ocean (Carton et al. 2018), NOAA sea surface temper-  
74 ature (SST; Reynolds et al. 2007), NOAA net outgoing longwave radiation (OLR; Lee et al. 2007),  
75 ~~and~~ NESDIS vegetation temperature (Tucker et al., 2005), and CHIRP rainfall (Funk et al. 2014).  
76 Table 1 lists the acronyms, data source, horizontal resolution and time-span. Ocean-atmosphere  
77 fields with horizontal resolution finer than 0.5°50 km are capable of representing cross-shelf gradi-

78 | ents, and these are available in the satellite era 1980-2016<sup>5</sup>. SODA-3 provides sub-surface ocean  
79 | data on temperature, salinity, currents and vertical motion; driven by MERRA-2 winds, multi-  
80 | satellite altimeter and thermal measurements, blended with in-situ observations over the shelf.  
81 | ~~LCoupled~~ land-atmosphere-ocean evolution is described by coupled reanalysis ECMWF products  
82 | underpinned by data assimilation (Hamrud et al 2015).

83 | In addition to the monthly datasets, daily ECMWF-~~5int~~ sea level air pressure (SLP) fields  
84 | were analyzed using ~~transient~~ empirical orthogonal functions (EOF). The leading mode was deter-  
85 | mined and its spatial loading pattern and time score were analyzed for evolution at lags from -2 to  
86 | +2 days, and for trends and spectral cycling ~~inover~~ the period 1900-2015. Ship data, from the repos-  
87 | itory for marine data collected in South African waters: SADCO, were analyzed in 0.1° bins for  
88 | SST and wind speed, averaged 24.5-26.5°E 1950-2015 (cf. Fig A1) and compared with 0.3° reanal-  
89 | ysis products. Monthly river discharge records were obtained for the Gamtoos and Sundays Rivers  
90 | from the SA Department of Water Affairs hydrology service: SADW, and combined to understand  
91 | the coastal hydrology.

92 | Bias was examined via inter-comparisons between SADCO SST and wind speed, and the  
93 | satellite-era reanalyses (CFSr-2, ECMWF-5, MERRA-2). These show coherent cross-shelf gradi-  
94 | ents (cf. Fig A1) indicating they capture the inshore upwelling. The reanalyses diverge at the coast,  
95 | depending on resolution and land-sea ratio.

96 | The statistical method ~~used to for quantifying~~ analyzing marine climate change is ~~linearto~~ re-  
97 | gression-of a trend line over a long record of temporal data, using the Pearson Product Moment  
98 | least squares technique. The resultant slope and  $r^2$  fit of the regression line provides a statistical way  
99 | of determining the rate of change or trend (signal) within the inter-annual fluctuations (noise). The  
100 | temporal data are filtered to annual and area-averages, according to the insights required.

101 | Linear trends are spatially analyzed per grid point in three domains: large-scale map 45°-  
102 | 20°S, 10°-50°E, regional-scale map: 32-37°S, 20-30°E, and depth sections over the shelf: 37-33°S,

103 averaged 24.5-26.5°E. Local trends are calculated by regression onto time series averaged over the  
104 index area (35.5-33.5°S, 24.5-26.5°E, [Fig 1a](#)) after reduction to annual and seasonal (Dec-Feb) [av-](#)  
105 [eragesinterval](#). For example, a sea temperature warming of 3°C over 100 years yields a .03 C/yr  
106 slope which is mapped in relation to adjacent regression-fitted slopes. If year-to-year fluctuations  
107 reduce the  $r^2$  fit below a certain statistical threshold, then it is inferred that the signal is swamped by  
108 noise. Trends for U, V, W wind and current components are calculated separately and combined  
109 into 'trend' vectors that represent the slope or rate of change, as maps and sections. The  $r^2$  fit of the  
110 trend is evaluated for significance at 95% confidence. For long-term records having > 100 degrees  
111 of freedom, a meaningful outcome requires  $r^2 > 4\%$  ( $r > |0.2|$ ). For satellite era records having < 40  
112 degrees of freedom, thresholds are reached at  $r^2 > 9\%$  ( $r > |0.3|$ ). Trends are embedded in noisy ma-  
113 rine environments, and so depend on time-span, local climate variability (Schlegel and Smit 2016),  
114 and quality of the input data (Chaudhuri et al. 2013). The CFSr-2, ECMWF-~~int~~, and MERRA-2  
115 reanalyses exhibit similar trends (Kennedy et al. 2011, Decker et al. 2012) and yield comparable  
116 turbulent fluxes around South Africa ([Nkwinkwa et al. 2019](#)).

117 The trend of SST and zonal winds are analyzed by correlating the slope against its time se-  
118 ries, for each month. For ~~most variables zonal winds,~~ the index area is: ~~used (~~35.5-33.5°S, 24.5-  
119 26.5°E ([Fig 1a](#)); ~~), but~~ for SST the ~~analysis distinguishes between~~ coast (33.8-33(33.8-9°S) and  
120 shelf-edge (34.9-35.0(0°S) ~~are distinguished~~ ~~latitude bands~~. The resultant correlation values per  
121 month are plotted over the annual cycle to detect the seasonality of trends in the period 1980-2015.

122 Using 18-month filtered values, hovmoller plots were constructed across the shelf to identify  
123 how intra-decadal fluctuations mingle with climate change signals. After exploratory statistical  
124 tests, a modulating influence was attributed to the Pacific southern oscillation index (SOI) or east-  
125 west difference in SLP. Its time score is analyzed for trend and correlated with local SST and zonal  
126 winds in annual and seasonal intervals 1980-2015. Similarly, a dipole mode is extracted by EOF  
127 analysis of filtered ECMWF-esm projected SLP fields in the tropical Pacific, and temporal charac-  
128 teristics are studied.

129 Projections of air temperature, precipitation and zonal winds from the coupled ensemble  
130 ECMWF-esm v2.3 model (Taylor et al. 2012, Doblas-Reyes et al 2018) are analyzed over 1980-  
131 2100 as large-scale trend maps and index-area time series. The simulation is forced by the rcp8.5  
132 greenhouse scenario (vanVuuren et al. 2011, CO<sub>2</sub> +5 ppm/yr), and incorporates data assimilation in  
133 the first 35 years that overlap with observations. Like most long-term projections, intra-member  
134 dispersion is constrained by ensemble averaging and trends therefore emerge. The coupled ensem-  
135 ble Hadley-esm model (Collins et al. 2011) is analyzed for zonal currents [in the 0-50 m layer](#). Prior  
136 research found that this model is one of the few to realistically represent ocean ‘dynamic topogra-  
137 phy’ [\(July 2018\)](#) and sea level pressure fields around southern Africa (Dieppois et al. 2015). Its  
138 mean annual cycle of zonal currents closely follows the reference Aviso-Copernicus product (cf.  
139 Fig A2).

140 An intercomparison of [in-situ measurements](#), reanalysis fields and model simulations is  
141 covered in the Appendices; the above references provide insight on global validations. [SADC sShip](#)  
142 SST and wind speed data [averaged in-situ in 0.1 deg+0 km intervals](#) describe the cross-shelf gra-  
143 dient in Figure A1, [compared with reanalysis at native resolution](#). The coarser [long-term model and](#)  
144 [reanalysis](#) products (cf. Table 1) under-represent ~~the~~ inshore upwelling, [soand- outcomes](#) are ~~thus~~  
145 restricted to large-scale winds and rainfall. Annual cycle inter-comparisons of index-area SST and  
146 zonal wind 1980-2015 are given in Figure A2, and suggest that model seasonality is ~10% greater  
147 than observed. [In Figure A3, context is provided on regional SOI influence.](#)

## 148 **Results**

### 149 **Study area and large-scale trend maps**

150 The study area is illustrated in Fig 1a, and shows steep topographic and bathymetric gradi-  
151 ents, with >1000 m mountains in latitudes < 33°S, the coast at 34°S, shelf-edge at 35°S and deep  
152 ocean to the south. The coastline is convex and indented by two bays and associated capes; the con-  
153 tinental slope steepens eastward. The vegetation trend map (Fig 1b) reflects a warming rate of

154 .1°C/yr since 1980 that increases northwest inland in conjunction with potential evaporation losses  
155 (-.005 mm day<sup>-1</sup>/yr). Coastal cities of Port Elizabeth and East London have slower rates of warm-  
156 ing. The coarse-scale ECMWF-20c trend maps for SST and zonal wind (Fig 1c,d) reveal a warming  
157 .02°C/yr in the Agulhas Current retroflection and reduced values in the sub-tropical zones where  
158 easterly winds are accelerating over 1900-2010 (U = -.01 m s<sup>-1</sup>/yr), consistent with Dlomo (2014).  
159 Easterly winds have accelerated in the south Atlantic and south Indian anticyclones and over the  
160 interior of southern Africa, but in the southern mid-latitudes a westerly trend is noted over the 20<sup>th</sup>  
161 century.

162 The ECMWF-20c trend map for precipitation minus evaporation (Fig 1e) indicates a grow-  
163 ing deficit in the Mozambique Channel, the source region of the Agulhas Current (Fig 1f). Weaker  
164 deficits are noted over the South Atlantic, while weak surplus trends are found over the eastern  
165 highlands of South Africa and in the South Indian Ocean mid-latitudes. The shelf-edge Agulhas  
166 Current converges and accelerates just east of the study area, then fans out and retroflects (Lutje-  
167 harms 2006).

### 168 **Regional ocean trend maps and sections**

169 The NOAA SST trend map shows warming ~~>-.05°C/yr~~ along the shelf edge 1981-2016  
170 (Fig 2a) similar to Rouault et al. (2010), and -Yet inshore there is a distinct cooling trend that is  
171 faster in Algoa Bay than elsewhere (-.03°C/yr inshore). Trends in SODA-3 salinity are weakly posi-  
172 tive along the coast in the period 1980-2015, suggesting reduced river run-off and greater evapora-  
173 tion. Surface layer flow is accelerating in the shelf-edge Agulhas Current, particularly downstream  
174 from the study area (Fig 2c). Outside the current, a pair of gyres (36°S, 25° & 29°E) directs flow  
175 toward the coast. This onshore pattern has little context and may be set aside until confirmed else-  
176 where.

177 SODA-3 depth section trends (Fig 2d,e,f) show that the warming trend at the shelf edge is  
178 aligned with a locally # accelerating Agulhas Current (U = -.006 m s<sup>-1</sup>/yr at 35.3°S; Backeberg et al.

179 | 2012). The cooling trend along the coast is confined to a shallow layer < 40 m, and would accentuate the  $\partial\eta/\partial y$  gradient. Trends in the meridional circulation reveal upwelling at depth and offshore  
180 |  
181 | transport in the near-shore zone. There is a sharp transition to downwelling and onshore transport  
182 | seaward of 35.6°S. Taken together the trend is for convergence onto the Agulhas Current and faster  
183 | downstream advection at the shelf edge. Trends Changes in the Agulhas Current are relatively uniform over depth (cf. Fig 2e), suggesting exhibit little vertical shear, that consequently cyclonic vorticity-induced uplift is locally uniformly available but concentrated by the shelf slope (cf. Fig  
184 | 2f)(Lutjeharms 2006).  
185 |  
186 |

### 187 | **Regional wind and pressure trends**

188 | Trend maps are illustrated for reanalysis winds and latent heat flux in Fig 3a,b. Winds show  
189 | a distinct shift toward easterly winds 1980-2015, linking the South Atlantic and South Indian anti-  
190 | cyclones. The wind trends follow the convex coastline and divide zones of rising and falling latent  
191 | heat flux, consistent with the SST trends (cf. Fig 2a). A trend toward northeasterly winds and The  
192 | reduced moisture flux over land in the terrestrial environment promotes hydrological deficit.

193 | Regional atmospheric circulation trends were studied via EOF analysis of Dec-Feb daily  
194 | SLP data. This helps place the transient weather into long-term context. Mode-1 accounts for 38%  
195 | of variance (Fig 3c,d). Its loading pattern shows a mid-latitude anticyclone passing eastward over a  
196 | 5-day period, followed by a trough along the west coast that subsequently spawns a coastal low.  
197 | The mode-1 time score shows fluctuations within an upward trend (slope = .008 hPa/yr,  $r^2 = 11\%$ ),  
198 | indicating more frequent anticyclonic ridging. The gradual poleward shift of the subtropical wind  
199 | belt is comprized of pulsed synoptic weather.

### 200 | **Shelf analysis and gradients**

201 | Hovmoller plots were constructed across the southern shelf (Fig 4a-d,b) for 18-month fil-  
202 | tered SST surface temperature, and zonal winds / currents / vertical motion, and rainfall. There is a  
203 | multi-year alternation of warm and cool. Warm spells during westerly wind driven downwelling



204 ~~contrast with cool spells during easterly wind driven upwelling: a multi-year alternation,~~ modulated  
205 by local winds and the Pacific El Nino / La Nina (Jury 2015, 2019) and the Southern Annular Mode  
206 (Malan et al. 2019). ~~Yet~~ there is a background trend ~~of toward~~ inshore cooling and offshore warm-  
207 ing that intensifies the coastal gradient (Fig 4a). ~~The SST pattern is supported by Ekman transport~~  
208 from inshore easterlies and offshore westerlies - that pulse in 1992 and 2013 (Fig 4b). Rainfall (Fig  
209 4c) displays a sharp boundary at 34.5°S between dry inshore / wet offshore climates. Coastal  
210 upwelling and atmospheric subsidence suppress moist convection, whereas the Agulhas Current  
211 enhances marine rainfall ~ 3-fold. The sharp change in CHIRP rainfall regime on 34.5°S coincides  
212 with accelerated longshore winds. The hovmoller plot of SODA-3 near-surface zonal currents (Fig  
213 4d) reveals pulsed intensification and coastward shift, contributing to near-shore uplift > 4 m/day  
214 (34.1-34.4°S). ~~C~~~~Thus~~ ~~current-~~ and wind-induced upwelling appear additive much of the time. How-  
215 ever in 2013 currents prevailed over winds, suggesting occassional decoupling.

216 Index-area time series of reanalysis and projected near-surface zonal currents (Fig 4c) show  
217 a trend of local n-accelerationng tendency. Past and future linear regression slopes are  $-.0076 \text{ m s}^{-1}$   
218  $/\text{yr}$ , with trend correlations rising from  $-.81$  to  $-.90$ . Future (2<sup>nd</sup> order) trends overlie those from past  
219 reanalysis and year-to-year fluctuations are consistent despite technology artifacts of satellite altim-  
220 etry and ensemble averaging. Appendix A2 compares the index-area annual cycle of model vs ob-  
221 servation. This index-area covers much of the Agulhas Current in longitudes where the shelf is con-  
222 vex (cf. Figs 1a, 2e).

223 The trend of NOAA SST analyzed in coastal and shelf-edge latitudes show contrasting val-  
224 ues but little change over the annual cycle in Fig 5a. Shelf-edge waters are warming steadily ( $r=$   
225  $+.5$ ) while coastal waters are cooling ( $r= -.5$ ), ~~slightly~~ moreso from February to May (slope  $-$   
226  $.04^\circ\text{C}/\text{yr}$ ). Together these indicate a tightening gradient ( $\partial T/\partial y$ ) and a steepening sea slope. The  
227 annual cycle of index-area zonal wind trends (Fig 5b), averaged over three reanalyses, reveals that  
228 easterly winds are intensifying during summer (Nov-Feb), when subtropical ridging is most likely.

229 Regression of SST and winds onto the southern oscillation index (Fig 5c,d) reveals trend  
230 patterns similar to climate change: inshore cooling (mainly summer) and offshore warming (all-  
231 year). Winds with respect to high-phase SOI are from northeasterly and considerably stronger in  
232 summer, hence wind-driven coastal upwelling is favoured during La Nina. The southern oscillation  
233 index has shown an upward trend during the satellite era, and its regression onto regional sea level  
234 air pressure patterns (cf. Fig A3) matches the earlier mode-1 pattern of mid-latitude high / sub-  
235 tropical low (cf. Fig 3c). ~~Hence long-term and multi-decadal trends tend to conspire~~  
236 ~~are acknowledged to be additive here.~~

### 237 **Hydrology trends**

238 The ~~earlier discovery of~~ increasing near-shore salinity (cf. Fig 2b) ~~could be was~~ related to  
239 drying trends in the adjacent terrestrial climate, ~~supported by declining latent heat flux~~ (cf. Fig 3b).  
240 In Fig 5e the regional hydrology is studied using the combined Gamtoos and Sundays River dis-  
241 charge record. Although flood / drought events and 2-5 yr cycles are evident, there is ~~no appreciable~~  
242 little trend. The study area lies between a zone of reduced cloudiness (Benguela – Namib) to the  
243 northwest and increased cloudiness to the southeast, as seen in the trend map for satellite net OLR  
244 (Fig 5f). ~~The rising~~ Increasing salinity ~~off~~along the south coast (cf. Fig 2b) may be attributed  
245 ~~scribed~~ to advection from the Mozambique Channel, where evaporation exceeds precipitation (cf.  
246 Fig 1e). Vertical motions over the shelf could also play a role (cf. Fig 2f), whereby cyclonic shear  
247 lifts salty water.

### 248 **Model projections under greenhouse warming**

249 Spatial maps of ECWMF-esm rcp8.5 trends for zonal wind and rainfall 1980-2100 show a  
250 key feature southeast of the study area (Fig 6a,b). Easterly winds are projected to increase and  
251 rainfall is expected to decrease. The warm moist air carried westward beneath a stable inversion  
252 layer generates less evaporation, so rain-bearing storms are projected to diminish in strength and  
253 be deflected poleward by the sub-tropical anticyclone.

254 Time series of index-area values comparing ECMWF-20c reanalysis with ECMWF-esm  
255 and Hadley-esm projections are given in Fig 6c-f. Coupled ensemble values overlie the observa-  
256 tion-based product indicating little bias but lower variance. Zonal winds that oscillate in a station-  
257 ary manner through the 20<sup>th</sup> century tend toward easterly (-U) in conjunction with declining pre-  
258 cipitation. Air temperatures show a gradual rise during the 20<sup>th</sup> century in both reanalysis and  
259 overlapping simulation. Thereafter, the warming trend steepens due to the greenhouse scenario.  
260 There appears to be little moderating influence of cooler nearshore SST, which coarse resolution  
261 products under-represent (cf. Fig 1c). The SOI time series is relatively stationary, but larger am-  
262 plitude swings are noted in the early 20<sup>th</sup> and late 21<sup>st</sup> century. High phase (Pacific La Nina)  
263 events seem steady but El Nino events appear to deepen after 2040. In summary, past zonal winds  
264 of 1 m/s (after cancellation of east-west components) are projected to reach -1 m/s by 2050. Past  
265 rainfall of 1.5 mm/day declines below 1 mm/day, and air temperatures of 17°C rise above 20°C  
266 by 2050. The regression  $r^2$  fit of trends are in the range from 72-97% and suggest sustained  
267 changes for temperature, however wind and rain tend to oscillate in the ECMWF-esm projection  
268 until the rcp8.5 scenario prevails.

269 In addition to ENSO influence, the Southern Annular Mode (SAM) plays a role in the lati-  
270 tude and intensity of basin-scale anticyclonic gyres that support the Agulhas Current (Yang et al.  
271 2016; Elipot and Beal 2018). The long-term trend in the SAM is a contraction of circumpolar  
272 westerlies that enables poleward expansion of the tropical Hadley circulation and belt of easterly  
273 winds rounding the tip of Africa seen here (cf. Fig [3a](#), 6a). Yet SAM trends are flattening with  
274 recovery of the Antarctic ozone hole (Arblaster et al. 2011), and may exert less effect in future.

## 275 **Discussion and summary**

276 This study addressed a range of questions around spatial patterns in trends and uncovered  
277 evidence of a pulsed poleward shift of the subtropical ridge (cf. Fig 3c,d). Analysis of land-  
278 atmosphere-ocean conditions revealed intensified coastal upwelling from increased easterly winds.  
279 A steeper  $\partial T/\partial y$  produces a locally faster shelf-edge current, with consequences for ~~and~~ current-

280 ~~induced upwelling (Schumann & Beekman 1984, Swart & Largier 1987) and increased easterly~~  
281 ~~wind, with consequences for~~ coastal desiccation. Employing coupled reanalysis and model projec-  
282 tions to distinguish coast and offshore features, a unifying ~~pattern~~~~process emerged~~~~was found~~: sum-  
283 mer-time wind-driven upwelling enhances geostrophic gradients and the Agulhas Current. ~~Alt-~~  
284 ~~hough ocean reanalysis outcomes are moving toward~~ ~~The technology is reaching~~ consensus ~~based~~  
285 ~~on a shared data assimilation system, yet~~ interpretations need not favour one process over another:  
286 wind vs current, fluxes vs advection, multi-decadal vs trend, local vs remote. ~~Multi-variate forcing~~  
287 ~~is~~ ~~We do not~~ ~~expected~~ ~~one dimensional answers.~~

288 To place these results in context, trends in ~~global coastal~~ SST were analyzed ~~over the satel-~~  
289 ~~lite era~~~~around the world (not shown).~~ Coastal upwelling zones show cooling  $< -0.03^{\circ}\text{C}/\text{yr}$ : ~~broadly~~  
290 ~~off SW Africa (Namibia) 35-20S, NW Africa (Sahara) 15-30N, SW America (Peru) 5-25S and Cali-~~  
291 ~~fornia 30-40N, and narrowly off~~ Somalia 10-15N, ~~Namibia 35-20S and Western Sahara 15-30N.~~  
292 ~~Even shelf waters of the USA Carolinas 30-40N are cooling and, like the south coast of South Af-~~  
293 ~~rica, there is~~ a warm current offshore. ~~Steeper~~ gradients could produce faster shelf-edge flow, ~~but~~  
294 the Gulf Stream is decelerating (Jury 2020) unlike the Agulhas Current. Figures ~~2c and 4de~~ gave  
295 evidence of ~~locally a significant~~ ~~increasing~~ ~~in~~ westward currents off Cape St Francis (~~35.5-33.5S;~~  
296 ~~24.5-26.5E)~~ ~~in using low resolution~~ ocean reanalysis and coupled model projections. ~~Perhaps~~  
297 wind-driven eddies are broadening the Agulhas Current ~~over and that~~ multi-year ~~periods, in addi-~~  
298 ~~tion to background~~ ~~fluctuations prevail over long term~~ trends (Elipot and Beal 2018). International  
299 monitoring efforts such as the ASCA line (Morris et al. 2017) could resolve ambiguities arising  
300 from the extrapolation of short-term records. ~~Our analysis does not claim the whole Agulhas Cur-~~  
301 ~~rent is strengthening, only along the shelf-edge of the eastern Agulhas Bank.~~

302 Another way of placing these results in perspective is to compare trends in coastal SST with  
303 variance from the annual cycle (i), inter-annual variability (ii), and intra-seasonal fluctuations (iii).  
304 The index-area standard deviations are:  $2.5^{\circ}\text{C}$  (i),  $0.7^{\circ}\text{C}$  (ii), and  $0.9^{\circ}\text{C}$  (iii) respectively, compared  
305 with a 35-yr decline in coastal SST of  $-2.4^{\circ}\text{C}$ . Applying linear regression to coastal SST data with

306 and without the annual cycle achieves  $r = -.29$  vs  $-.76$ . Either way the trend is significant, not only  
307 statistically but in terms of environmental impact.

308 In this study, modern reanalysis datasets have been used for mapping the marine climate  
309 trends over the southern shelf of South Africa. Cross-shelf gradients in sea temperatures, latent heat  
310 flux, currents and upwelling are apparent in the satellite era. SST in the offshore zone ~~is~~ warm-  
311 ing ( $.05^{\circ}\text{C}/\text{yr}$ ) since 1980 and there is a trend toward easterly winds, mainly in summer ( $U = -.015$   
312  $\text{m s}^{-1}/\text{yr}$ ). The shelf-edge Agulhas Current is accelerating ( $U = -.006 \text{ m s}^{-1} / \text{yr}$ ) in longitudes 21-28E  
313 (cf. Fig 2c) partly due to large scale winds over the southwest Indian Ocean (Backeberg et al. 2012)  
314 that align with the local forcing seen here. The faster current and ‘following’ wind induces coastal  
315 uplift (Leber et al. 2017) and cooling ( $-.03^{\circ}\text{C}/\text{yr}$ ). As the sub-tropical ridge is drawn poleward, the  
316 cross-shore gradient steepens (cf. Fig A1). Cooler near-shore sea temperatures ~~correspond with~~  
317 ~~tribute to~~ atmospheric subsidence, drying trends ( $-.005 \text{ mm day}^{-1}/\text{yr}$ ) and vegetation warming  
318 ( $.1^{\circ}\text{C}/\text{yr}$ ). Similar trends in local air-sea interactions are attributed to more frequent wind-driven  
319 coastal upwelling and easterly winds (cf. Fig 3a) similar to ~~in~~ Malan et al. (2019). Coupled ensem-  
320 ble projections from the Hadley and European models indicate that the shift toward drier weather,  
321 easterly winds, coastal upwelling and a locally faster Agulhas Current may be sustained through the  
322 21<sup>st</sup> century (cf. Fig 6c), as a local response to the poleward shift of the sub-tropical ridge. Some of  
323 the environmental changes could ~~benefit marine productivity and~~ create opportunities for resource  
324 adaptation (Jury 2019) and ~~Likely socio-economic consequences include an enhanced fishery that~~  
325 ~~could~~ spark interest in aquaculture and ecotourism.

326 While the shelf may benefit, terrestrial water resources could be headed towards greater  
327 stress. Although the hydrology is transitionally located between a drying west and moistening east,  
328 the Sundays River sees inter-basin transfers while the Gamtoos River depends on agricultural ‘re-  
329 cycling’. In both cases reduced runoff linked to rainfall could inhibit freshwater fluxes to the coastal  
330 ocean (cf. Fig 6b).

331 Parallel work on this geographic niche (Jury 2019, Jury and Goschen 2020) is on-going and  
332 further studies will: i) compare observation and reanalysis trends, ii) consider how changing satel-  
333 lite technology represents shelf dynamics, iii) quantify wind- vs current-driven upwelling, and iv)  
334 analyze coupled models capable of detecting sharp coastal gradients.

### 335 **Acknowledgements**

336 | SAPSE funding support from South Africa is acknowledged. [Reanalysis and projection](#) ~~Most~~ data  
337 derive from websites of the IRI Climate Library, KNMI Climate Explorer and Univ Hawaii AP-  
338 DRC.

### 339 **References**

- 340 Arblaster JM, Meehl G, Karoly D. 2011. Future climate change in the southern hemisphere: Com-  
341 peting effects of ozone and greenhouse gases, *Geophysical Research Letters* 38: L02701,  
342 doi10.1029/2010GL045384.
- 343 Backeberg B, Penven P, Rouault M. 2012. Impact of intensified Indian Ocean winds on mesoscale  
344 variability in the Agulhas system. *Nature Clim Change* 2: 608–612.
- 345 Balmaseda MA, Mogensena K, Weaver AT. 2013. Evaluation of the ECMWF ocean reanalysis  
346 system ORAS4, *Quarterly Journal of the Royal Meteorology Society* 139: 1132–1161.
- 347 Carton JA, Chepurin GA, Chen L. 2018. SODA-3: A new ocean climate reanalysis. *Journal of Cli-*  
348 *mate* 31: 6967–6983.
- 349 Chaudhuri AH, Ponte RM, Forget G, Heimbach P. 2013. A comparison of atmospheric reanalysis  
350 surface products over the ocean and implications for uncertainties in air–sea boundary forcing.  
351 *Journal of Climate* 26: 153–170.
- 352 Collins WJ, 17 co-authors. 2011. Development and evaluation of an Earth-System model – HadG-  
353 EM2. *Geoscience Model Development* 4: 1051–1075.
- 354 Decker M, Brunke MA, Wang Z, Sakaguchi K, Zeng X and Bosilovich MG. 2012. Evaluation of  
355 the reanalysis products from GSFC, NCEP, and ECMWF using flux tower observations. *Journal of*  
356 *Climate* 25: 1916–1944.

- 357 Dee DP, 35 co-authors, 2011. The ERA-interim reanalysis: configuration and performance of the  
358 data assimilation system. *Quarterly Journal of the Royal Meteorological Society* 137: 553–597.
- 359 Dieppois B, Rouault M & New M. 2015. The impact of ENSO on Southern African rainfall in  
360 CMIP5 ocean atmosphere coupled climate models. *Climate Dynamics* 45: 2425–2442.
- 361 Dlomo X. 2014. Sea surface temperature trends around Southern Africa. *MSc thesis*, Univ. Cape  
362 Town, 61 pp. < open.uct.ac.za/bitstream/handle/11427/12828/thesis\_sci\_2014\_dlomo\_x.pdf >
- 363 Doblus-Reyes FJ, 17 co-authors. 2018. Using EC-Earth for climate prediction research, *ECMWF*  
364 *newsletter* 154, < www.ecmwf.int/en/newsletter/154/meteorology/ >
- 365 [Durgadoo JV, Loveday BR, Reason CJ, Penven P, Biastoch A. 2013. Agulhas leakage predomi-](#)  
366 [nantly responds to the Southern Hemisphere westerlies. \*Journal of Physical Oceanography\* 43:](#)  
367 [2113–2131.](#)
- 368 [Elipot S, Beal LM. 2015. Characteristics, energetics and origins of Agulhas Current meanders and](#)  
369 [their limited influence on ring shedding. \*Journal of Physical Oceanography\* 45: 2294–2314.](#)
- 370 Elipot S, Beal LM. 2018. Observed Agulhas Current sensitivity to interannual and long-term trend  
371 atmospheric forcings. *Journal of Climate* 31: 3077–3098.
- 372 [Funk CC, Peterson PJ, Landsfeld MF, Pedreros DH, Verdin JP, Rowland JD, Romero BE, Husak](#)  
373 [GJ, Michaelsen JC and Verdin AP. 2014. A quasi-global precipitation time series for drought moni-](#)  
374 [toring. \*US Geological Survey Data Series\* 832: 1–4, doi10.110.3133/ds832.](#)
- 375 Gelaro R, 30 co-authors. 2017. The Modern-Era Retrospective Analysis for Research and Applica-  
376 tions, version 2 (MERRA-2). *Journal of Climate* 30: 5419–5454.
- 377 Goschen WS, Schumann EH. 1990. Agulhas Current variability and inshore structures off the Cape  
378 Province, South Africa. *Journal of Geophysical Research* 95: 667–678.
- 379 Goschen WS, Bornman TG, Deyzel SHP, Schumann EH. 2015. Coastal upwelling on the far east-  
380 ern Agulhas Bank associated with large meanders in the Agulhas Current. *Continental Shelf Re-*  
381 *search* 101: 34–46.
- 382 Hamrud M, Bonavita M, Isaksen L. 2015. Kalman filter and hybrid-gain ensemble data assimila-  
383 tion. Part I: EnKF implementation. *Monthly Weather Review* 143: 4847–4864.
- 384 [Hutchinson K, Beal LM, Penven P, Anson I, Hermes J. 2018. Seasonal phasing of Agulhas Cur-](#)  
385 [rent transport tied to a baroclinic adjustment of near-field winds. \*Journal of Geophysical Research\*](#)

Formatiert: Schriftart: Kursiv

Formatiert: Schriftart: Kursiv

386 | [Oceans 123: 7067–7083.](#)

387 Jury MR, MacArthur C, Reason C. 1990. Observations of trapped waves in the atmosphere and  
388 ocean along the coast of southern Africa. *South African Geographical Journal* 72: 33–46.

389 Jury MR. 2013. Climate trends in southern Africa. *South African Journal of Science* 109: 53–63.

390 Jury MR. 2015. Passive suppression of South African rainfall by the Agulhas Current, *Earth Inter-*  
391 *actions* 19: 1–14.

392 | ~~Jury MR. 2018. Puerto Rico sea level trend in regional context, *Journal of Ocean and Coastal*  
393 *Management* 163: 478–484.~~

394 | ~~Jury MR. 2019. Meteorological controls on big waves south of Africa, *Regional Studies in Marine*  
395 *Science* 27: 100538.~~

396 Jury MR. 2019. Environmental controls on marine productivity near Cape St Francis, South Africa,  
397 *EGU Ocean Science*, doi.org/10.5194/os-2019-55.

398 Jury MR. 2020. Slowing of Caribbean through-flow, *Deep Sea Research* 2: 168,  
399 doi10.1016/j.dsr2.2019.104682.

400 Jury MR. and Goschen W.S. 2020. Physical ocean-atmosphere variability over the shelf of South  
401 Africa from reanalysis products. *Continental Shelf Research*, (in press).

402 Kennedy AD, Dong X, Xi B, Xie S, Zhang Y, Chen J. 2011. A comparison of MERRA and NARR  
403 reanalyses with the DOE ARM SGP data. *Journal of Climate* 24: 4541–4557.

404 Kruger AC, Shongwe S. 2004. Temperature trends in South Africa: 1960–2003. *International Jour-*  
405 *nal of Climatology* 24: 1929–1945.

406 Kruger AC, Nxumalo MP. 2017. Historical rainfall trends in South Africa: 1921–2015, *WaterSA*  
407 43: 285–297.

408 Leber GM, Beal LM and Elipot S. 2017: Wind and current forcing combine to drive strong  
409 upwelling in the Agulhas Current. *Journal of Physical Oceanography*, 47, 123–134,

410 Lee H-T, Gruber A, Ellingson RG, Laszlo I. 2007. Development of the HIRS outgoing longwave  
411 radiation climate dataset. *Journal of Atmospheric and Oceanic Technology* 24: 2029–2047.

412 Lutjeharms JRE. 2006. *The Agulhas Current*. Springer, Berlin: 329 pp.

413 Lutjeharms JRE, Cooper J, Roberts MJ. 2000. Upwelling at the inshore edge of the Agulhas Cur-



414 rent. *Continental Shelf Research* 20: 737–761.

415 MacKeller N, New M, Jack C. 2014. Observed and modelled trends in rainfall and temperature for  
416 South Africa: 1960–2010. *South African Journal of Science* 110: 1–13.

417 Malan N, Backeberg B, Biastoch A, Durgadoo JV, Samuelsen A, Reason C, Hermes J. 2018. Agul-  
418 has Current Meanders facilitate shelf - slope exchange on the Eastern Agulhas Bank. *Journal of*  
419 *Geophysical Research Oceans* 123: 4762–4778.

420 Malan NC, Durgadoo JV, Biastoch A, Reason CJ, Hermes, JC. 2019. Multidecadal wind variability  
421 drives temperature shifts on the Agulhas Bank. *Journal of Geophysical Research Oceans* 124:  
422 3021– 3035.

423 Mather AA, Garland GG, Stretch DD. 2009. Southern African sea levels: corrections, influences  
424 and trends, *African Journal of Marine Science* 31: 145–156.

425 Morishima W, Akasaka I. 2010. Seasonal trends of rainfall and surface temperature over Southern  
426 Africa. *African Study Monographs* 40: 67–76.

427 Morris T, Hermes J, Beal L, du Plessis M, Rae CD, Gulekana M, Lamont T, Speich S, Roberts M,  
428 Ansoorge IJ. 2017. The importance of monitoring the Greater Agulhas Current and its inter-ocean  
429 exchanges using large mooring arrays. *South African Journal of Science* 113: 1–7.

430 Nkwinkwa N, Rouault M, Johannessen JA. 2019. Latent heat flux in the Agulhas Current. *MDPI*  
431 *Remote Sensing* 11: 1576.

432 Patrick P, Strydom NA, Goschen WS. 2013. Shallow-water, nearshore current dynamics in Algoa  
433 Bay, South Africa, with notes on the implications for larval fish dispersal. *African Journal of Ma-*  
434 *rine Science* 35: 269–282.

435 Philippon N, Rouault M, Richard Y, Favre A. 2012. The influence of ENSO on winter rainfall in  
436 South Africa. *International Journal of Climatology* 32: 2333–2347.

437 Poli P, 14 co-authors. 2016. ERA-20C: An atmospheric reanalysis of the Twentieth Century. *Jour-*  
438 *nal of Climate* 29: 4083–4097.

439 Reynolds RW, Smith TM, Liu C, Chelton DB, Casey KS, Schlax MG. 2007. Daily high-resolution  
440 blended analyses for sea surface temperature. *Journal of Climate* 20: 5473–5496.

441 Roberts MJ. 2010. Coastal currents and temperatures along the eastern region of Algoa Bay, South  
442 Africa, with implications for transport and shelf-bay water exchange. *African Journal of Marine*

Formatiert: Schriftart: Kursiv

443 *Science* 32: 145–161.

444 [Rouault M, Penven P, Pohl B. 2009. Warming in the Agulhas Current system since the 1980s. \*Geo-\*](#)  
445 [\*physical Research Letters\*, 36: L12602.](#)

446 Rouault M, Pohl B, Penven P. 2010. Coastal oceanic climate change and variability from 1982 to  
447 2009 around South Africa. *African Journal of Marine Science* 32: 237–246.

448 Rouault MJ, Penven P. 2011. New perspectives on Natal Pulses from satellite observations. *Journal*  
449 *of Geophysical Research Oceans* 116: 1–14.

450 Saha S, 51 co-authors. 2010. The NCEP Coupled Forecast System reanalysis. *Bulletin of the Ameri-*  
451 *can Meteorological Society* 91: 1015–1057.

452 Scharler UM, Baird D. 2005. The filtering capacity of selected Eastern Cape estuaries, South Afri-  
453 ca. *WaterSA* 31: 483–490.

454 Schlegel RW, Smit AJ. 2016. Climate change in coastal waters: time series properties affecting  
455 trend estimation. *Journal of Climate* 29: 9113–9124.

456 Schumann EH. 1999. Wind-driven mixed layer and coastal upwelling processes off the south coast  
457 of South Africa. *Journal of Marine Research* 57: 671–691.

458 Schumann EH, Perrins L-A, Hunter IT. 1982. Upwelling along the south coast of the Cape Prov-  
459 ince, South Africa. *South African Journal of Science* 78: 238–242.

460 [Schumann EH, Beekman LJ. 1984. Ocean temperature structures on the Agulhas Bank. \*Transac-\*](#)  
461 [\*tions of the Royal Society of South Africa\* 45: 191–203.](#)

462 Schumann EH, Brink KH. 1990. Coastal trapped waves off the coast of South Africa: generation,  
463 propagation and current structures. *Journal of Physical Oceanography* 20: 1206–1218.

464 Schumann EH, Martin JA. 1991. Climatological aspects of the coastal wind field at Cape Town,  
465 Port Elizabeth and Durban. *South African Geographical Journal* 73: 48–51.

466 Schumann EH, Pearce MW. 1997. Freshwater inflow and estuarine variability in the Gamtoos Estu-  
467 ary, South Africa. *Estuaries* 20: 124–133.

468 [Swart VP, Largier JL. 1987. Thermal structure of Agulhas Bank water, \*South African Journal of\*](#)  
469 [\*Marine Science\* 5: 243–252.](#)

470 Tadross M, Jack C, Hewitson B. 2005. On RCM-based projections of change in southern African

Formatiert: Schriftart: Kursiv

471 summer climate. *Geophysical Research Letters* 32: L23713, doi:10.1029/2005GL024460.

472 Taylor KE, Stouffer RJ, Meehl GA. 2012. An overview of CMIP5 and the experiment design. *Bul-*  
473 *letin of the American Meteorological Society* 93: 485–498.

474 Tucker CJ, Pinzon JE, Brown ME, Slayback DA, Pak EW, Mahoney R, Vermote EF, el Saleous N.  
475 2005. An extended AVHRR 8 km NDVI dataset compatible with MODIS and SPOT vegetation  
476 data. *International Journal of Remote Sensing* 26: 4485–4498.

477 van Bladeren D, Zawada PK, Mahlangu D. 2007. Statistical based regional flood frequency estima-  
478 tion study for South Africa using systematic, historical and paleo-flood data. *Water Research*  
479 *Commission Report* 1260/1/70, Pretoria.

480 VanVuuren DP, 14 co-authors. 2011. The representative concentration pathways: an overview,  
481 *Climatic Change* 109: 5–31.

482

483

484 **Table 1** Datasets used in the analysis, web sources are listed in acknowledgement.

| ACRONYM                  | NAME                                                                                                    | RESOLUTION                                                          | TIME SPAN                 |
|--------------------------|---------------------------------------------------------------------------------------------------------|---------------------------------------------------------------------|---------------------------|
| CFSr-2                   | Coupled Forecast System v2 <a href="#">coupled (air-land-sea)</a> reanalysis                            | 0.35 deg                                                            | 1980-2015                 |
| <a href="#">CHIRP</a>    | <a href="#">Climate Hazards InfraRed Precipitation (via Meteosat)</a>                                   | 0.05 deg                                                            | <a href="#">1981-2016</a> |
| ECMWF- <a href="#">5</a> | European Community Medium-range Weather Forecasts <a href="#">v5 coupled</a> reanalysis                 | 0.25 deg                                                            | 1980-2016                 |
| ECMWF-20c                | European Community Medium-range Weather Forecasts 20 <sup>th</sup> century atmosphere reanalysis        | 1.0 deg                                                             | 1900-2010                 |
| ECMWF-ora4               | European Community Medium-range Weather Forecasts ocean reanalysis                                      | 1.0 deg                                                             | 1958-2016                 |
| ECMWF-esm                | European Community Medium-range Weather Forecasts coupled ensemble 21 <sup>st</sup> century projections | 1.2 deg                                                             | 1980-2100                 |
| Hadley-esm               | Hadley Centre coupled ensemble model 21 <sup>st</sup> century projections for oceanography              | 1.5 deg                                                             | 2005-2100                 |
| MERRA-2                  | Modern Era Reanalysis for Research and Applications v2 (NASA)                                           | 0.5 deg                                                             | 1980-2015                 |
| NOAA                     | National Oceanic and Atmospheric Administration surface temperature and net outgoing longwave radiation | 0.25 deg ( <a href="#">SST</a> )<br>1.0 deg ( <a href="#">OLR</a> ) | 1981-2016                 |
| SADCO<br>SADW            | S. Africa Data Centre Oceanogr.<br>S.A. Dept. of Water Affairs                                          | In-situ measurements                                                | 1950-2015<br>1980-2016    |
| SODA-3                   | Simple Ocean Data Assimilation Reanalysis v3                                                            | 0.5 deg                                                             | 1980-2015                 |

485

## Figures

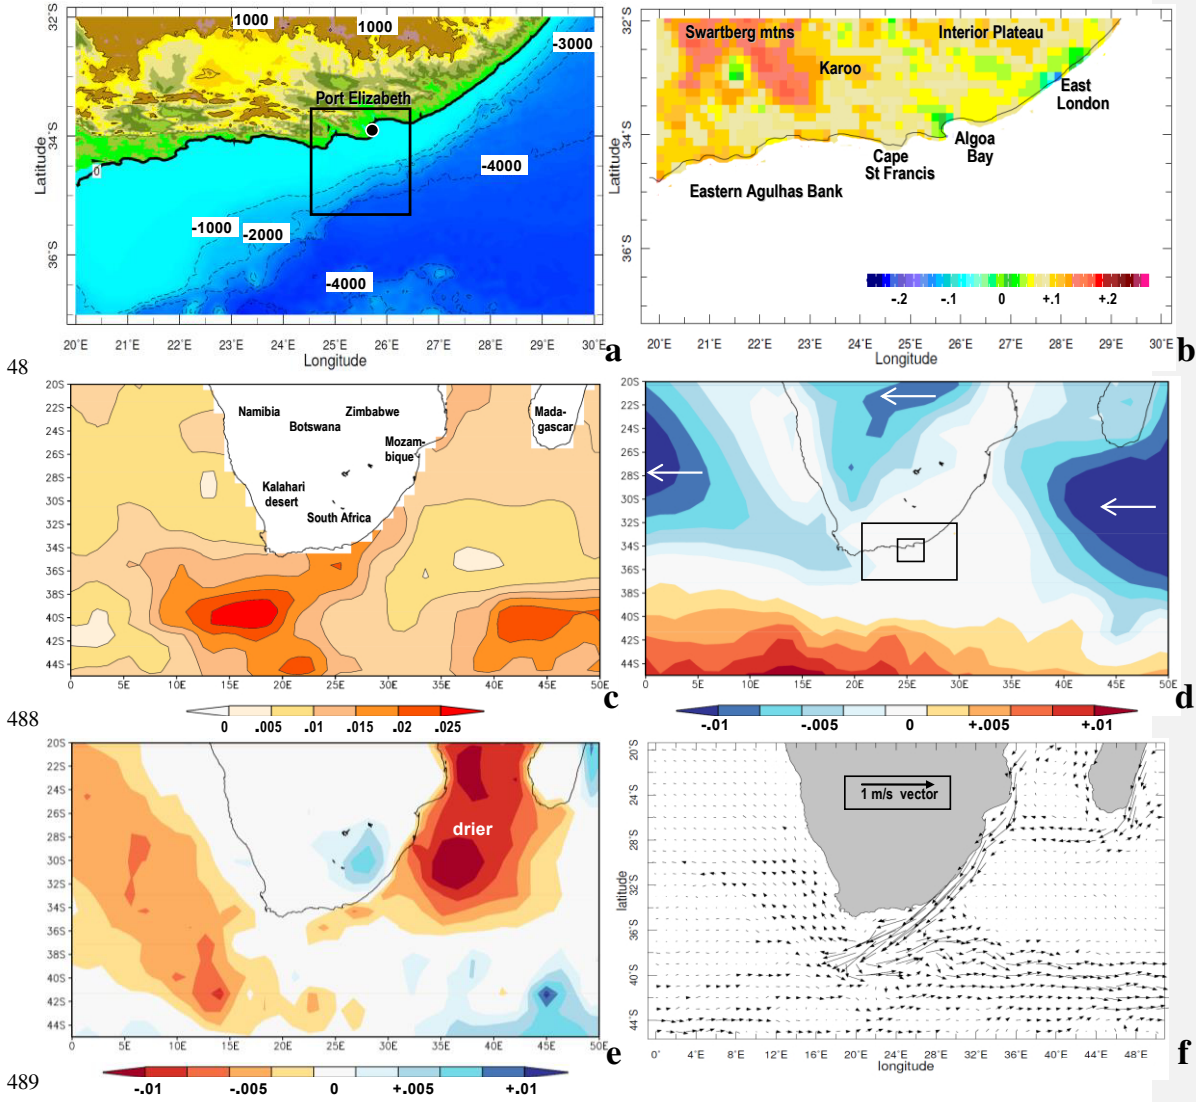

489

490

491 Figure 1 (a) Topography / bathymetry of the study area with index for temporal analyses (box) and Port  
 492 Elizabeth (dot). (b) Linear trend in annual NOAA vegetation temperature (C/yr 1981-2016). Large-scale  
 493 trends in annual: (c) Hadley SST (C/yr 1900-2016), (d) ECMWF-20c zonal wind (m s<sup>-1</sup>/yr 1900-2010),  
 494 with inner study domains, and (e) ECMWF-20c precipitation minus evaporation trend (mm day<sup>-1</sup>/yr). (f)  
 495 SODA3 mean 1-100 m currents (vector, with scale inset). Geographical labels are given in (b,c).

496

497

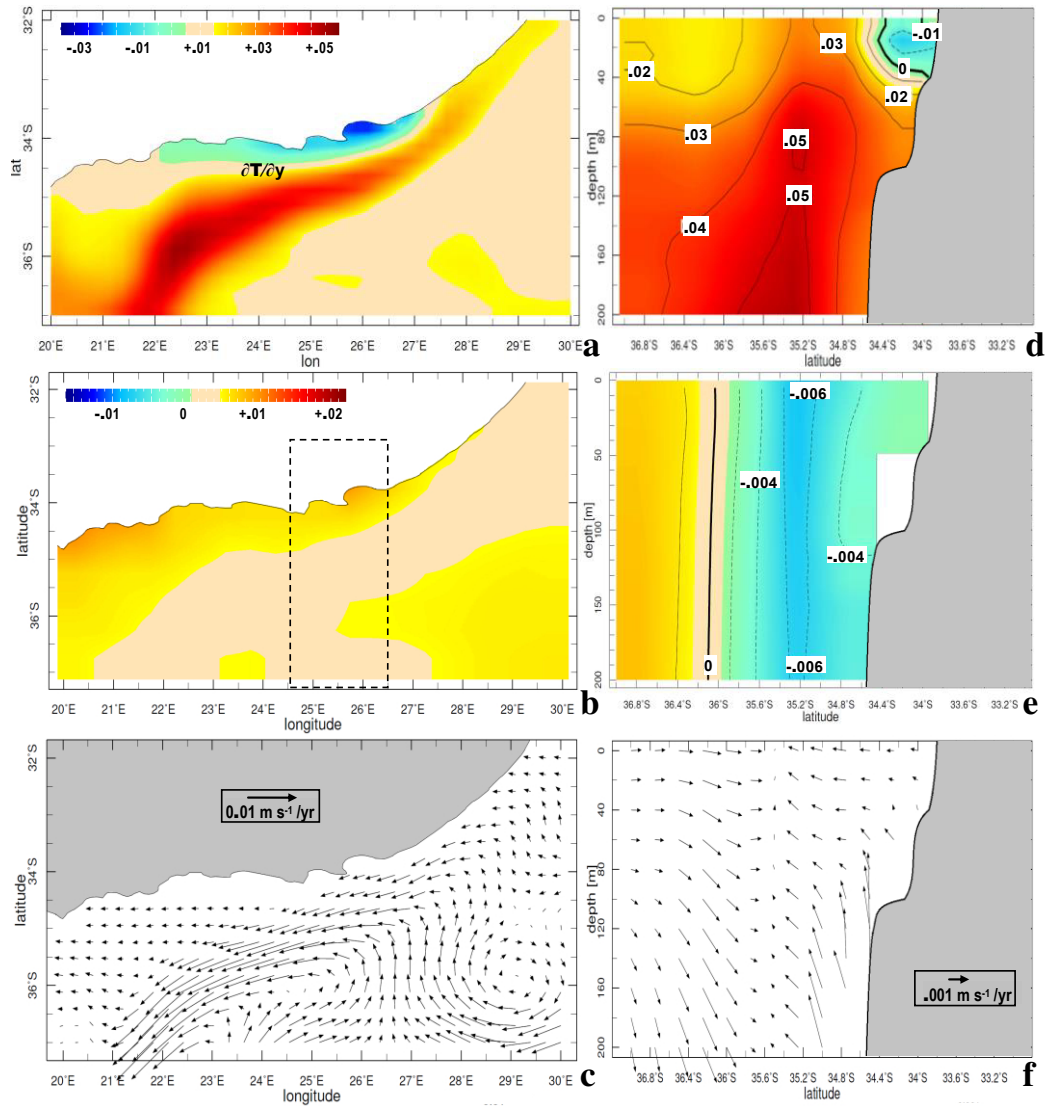

498

499

500

501 Figure 2 Regional trends in annual (a) NOAA sea surface temperature (C/yr 1981-2016); SODA-3 1980-  
 502 2015: (b) 1-10 m salinity (ppt/yr) with section denoted, and (c) 1-50 m currents (m s<sup>-1</sup>/yr vector); and depth  
 503 section averaged 24.5-26.5E of (d) sea temperature (C/yr), (e) zonal current (m s<sup>-1</sup>/yr), and (f) meridional  
 504 circulation (m s<sup>-1</sup>/yr vector, with W exaggerated). Vector scales are inset.

505

506

507

508

509

510

511

512

513

514

515

516

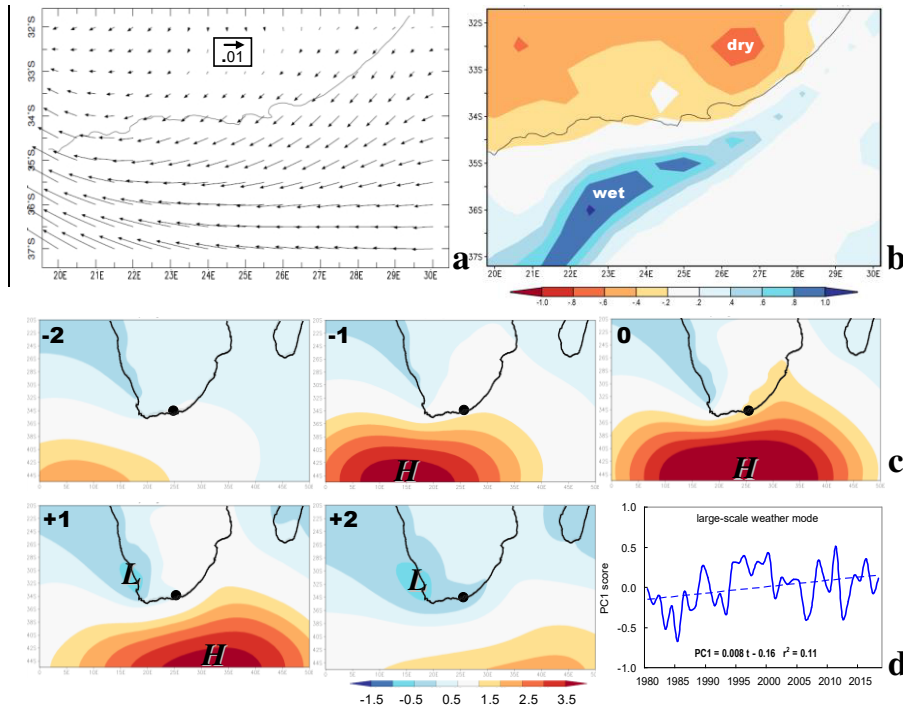

Figure 3 (a) Regional trend in annual CFSr-2 surface wind ( $\text{m s}^{-1}/\text{yr}$  vector, 1980-2015) and (b) latent heat flux ( $\text{W m}^{-2}/\text{yr}$ ). (c) Large-scale summer weather mode-1 in daily ECMWF sea level air pressure principal component loading pattern at lags -2, -1, 0, +1, +2 days (hPa) and (d) time score. PC1 represents 38% of variance, dot in (c) is the study area, inset in (d) is the slope and fit of the linear regression.

517

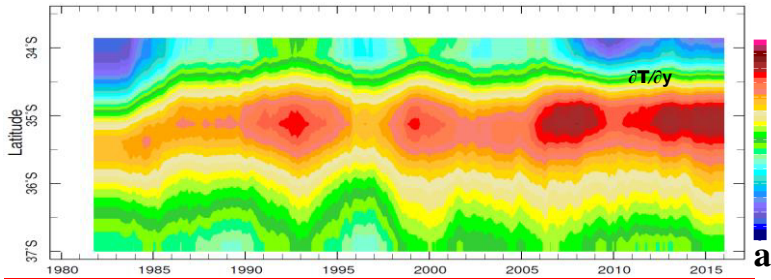

518

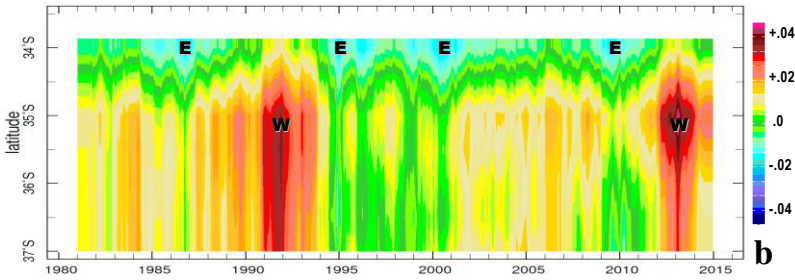

519

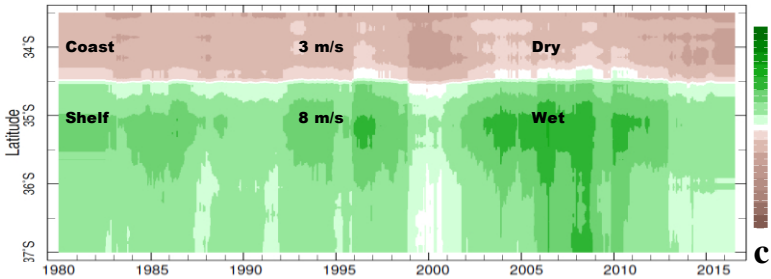

520

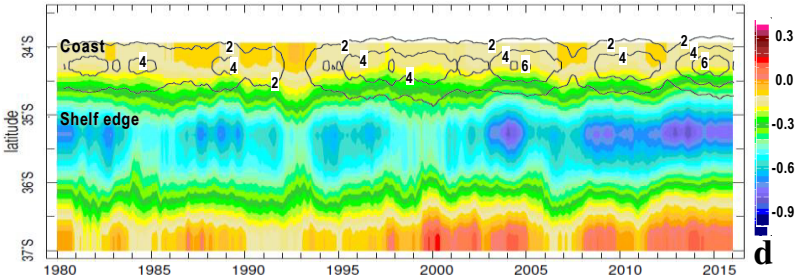

526

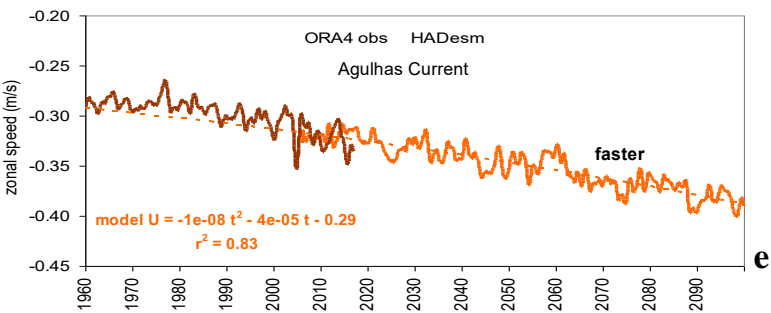

527

528 Figure 4 Hovmöller plots of 18-month filtered variables avg. 24.5-26.5E: (a) NOAA SST (C), (b) zonal  
 529 wind stress ( $N/m^2$ ), (c) CHIRP rainfall (mm/month), (d) SODA-3 1-50 m zonal current (shaded m/s) and  
 530 1-200 m upward motion (contour m/day). (e) Index-area time series of observed and projected 1-50 m  
 531 zonal current. ‘Coast’ and ‘Shelf’ climates and average wind speeds are labelled in (c).  
 532



533

534

535

536

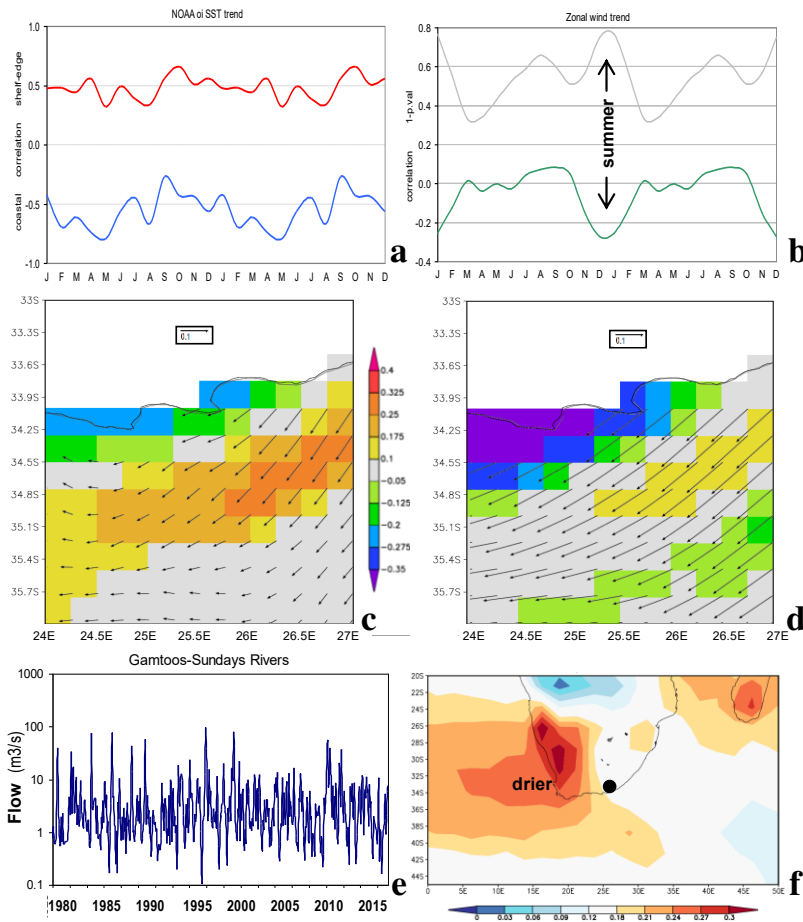

538 Figure 5 Analysis of monthly index-area trends for (a) coastal and shelf-edge SST, and (b) zonal wind and  
 539 its significance (1-p value), with 35 degrees of freedom. Regression of (c) annual and (d) summer NOAA  
 540 SST (shading °C) and SODA-3 surface wind (vector, scale inset m/s) with the SOI index 1981-2016 (units  
 541 are per SOI fraction). (e) Observed discharge of the combined Gamtoos and Sundays Rivers. (f) Trend of  
 542 NOAA net outgoing longwave radiation as a proxy for cloudiness ( $W m^{-2}/yr$  1979-2017) with dot showing  
 543 river gauges.

544

545

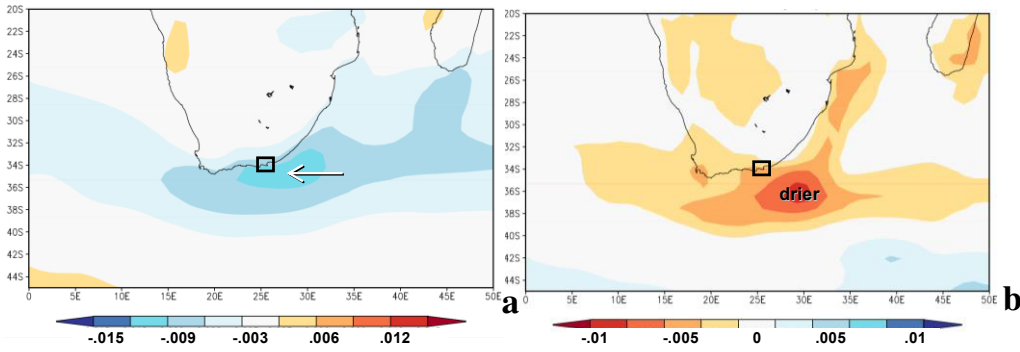

546

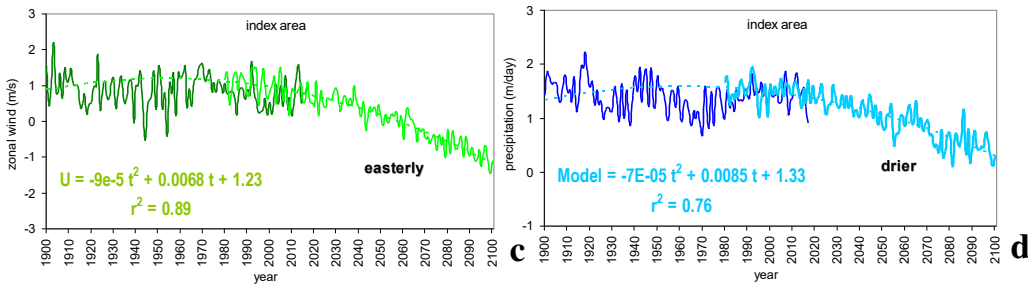

547

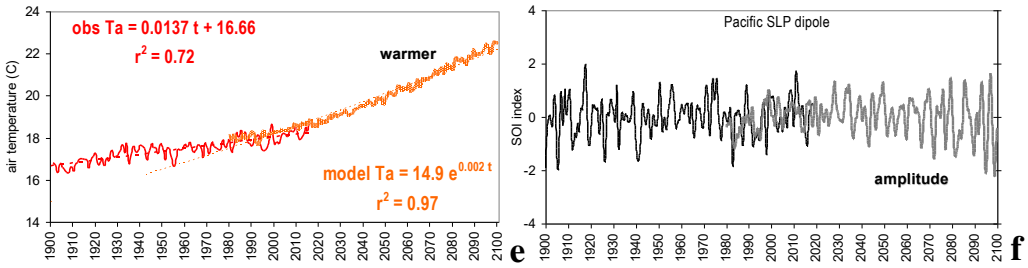

548

549 Figure 6 EC-esm projected trend maps 1980-2100: (a) zonal wind ( $\text{m s}^{-1}/\text{yr}$ ), (b) precipitation ( $\text{mm day}^{-1}/\text{yr}$ ).

550 Temporal record of index area ECMWF-20C reanalysis 1900-2010 and EC-esm projected 1980-2100: (c)

551 zonal wind, (d) precipitation, and (e) air temperature. (f) Observed and model projected Pacific southern

552 oscillation index (east-west SLP EOF mode). Best-fit trends are given; time series are composed of annual

553 averages.

554

555

556 **Appendix**

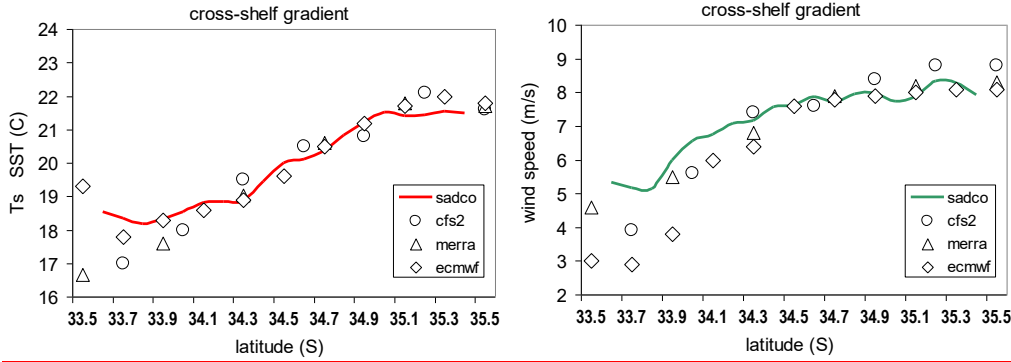

557  
 558 Fig A1 SADCO ship data; average ds per in each 0.1 latitude bin over 24.5-26.5E longitude 1950-2015; left  
 559 axis and dashed line refer to standard deviation; (line) and comparative ison with satellite era 0.3-reanaly-  
 560 sis binned CFSr2 (left) and ECMWF (dots).

561

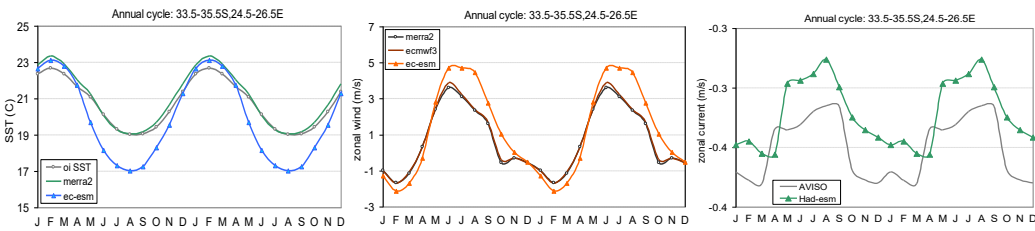

562  
 563 Fig A2 Annual cycles averaged over the index area; comparing model SST, surface zonal wind (middle) and  
 564 near-surface current with reference product. The model has an amplified annual cycle that is cooler and more  
 565 westerly in winter. Currents show summer / winter regimes with model slightly weaker and delayed.

566

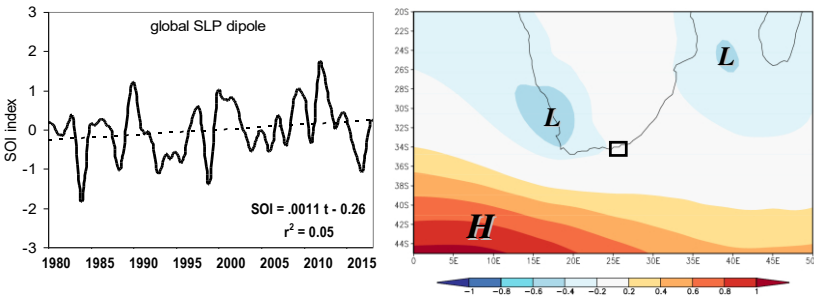

567  
 568 Fig A3 Graph of 18-month filtered southern oscillation index and its trend in the satellite era, and regres-  
 569 sion of Dec-Feb SOI onto regional sea level air pressure (hPa), with boxed index area.

571
